# Supplementary material for: Enhancing prime editing efficiency by modified pegRNA with RNA G-quadruplexes
Source: PubMed Central journal article supplement (PMC9345309; doi:10.1093/jmcb/mjac022), 2022-04-12
Supplement: mjac022_supplemental_file.pdf [file mjac022_supplemental_file.pdf]

## Enhancing prime editing efficiency by modified pegRNA with RNA G-quadruplexes

Xiangyang Li<sup>1,2,†</sup>, Xin Wang<sup>1,2,†</sup>, Wenjun Sun<sup>1,2,†</sup>, Shisheng Huang<sup>1,2</sup>, Mingtian Zhong<sup>3</sup>, Yuan Yao<sup>4</sup>, Qianjiang Ji<sup>5</sup>, and Xingxu Huang<sup>1,6,\*</sup>

<sup>1</sup>Gene Editing Center, School of Life Science and Technology, ShanghaiTech University, 100 Haik Rd., Pudong New Area, Shanghai 201210, China

<sup>2</sup>University of Chinese Academy of Sciences, Beijing 100049, China

<sup>3</sup>Institute for Brain Research and Rehabilitation, Guangdong Key Laboratory of Mental Health and Cognitive Science, Center for Studies of Psychological Application, South China Normal University, Guangzhou 510631, China

<sup>4</sup>Hangzhou Global Scientific and Technological Innovation Center, Zhejiang University, Hangzhou 311215, China

<sup>5</sup>School of Physical Science and Technology, ShanghaiTech University, 100 Haik Rd., Pudong New Area, Shanghai 201210, China

<sup>6</sup>Guangzhou Laboratory, No. 9 XingDaoHuanBei Road, Guangzhou International Bio Island, Guangzhou 510005, China

<sup>†</sup>These authors contributed equally to this work.

\*Correspondence to: Xingxu Huang, E-mail: [huangxx@shanghaitech.edu.cn](mailto:huangxx@shanghaitech.edu.cn)

## **Supplementary Materials and methods**

### ***Cell culture and transfection***

HEK293T, HeLa, and U2OS cell lines were cultured in Dulbecco's Modified Eagle's Medium supplemented with 10% (v/v) fetal bovine serum (FBS) at 37 °C with 5% CO<sub>2</sub>. For plasmid transfection, cells were seeded in 24-well a day before and transfected at about 70% density. A total of 900 ng PE2 plasmids, 300 ng pegRNA plasmids and 100 ng corresponding nick sgRNA plasmids were transfected into cells with EZ Trans (Shanghai Life iLab Biotech Co., Ltd) or Lipofectamine 2000 (Life Technologies) according to manufactures' instruction. 3 days after transfection, cells were harvested from Fluorescence Activating Cell Sorter (FACS).

### ***Plasmid construction***

Prime editing system plasmid was purchased from Addgene (Addgene, #132775). pegRNA plasmid was constructed according to the methods described in our previous study (Liu et al., 2020). To construct modified pegRNA plasmids, the plasmid backbone was amplified from pGL3-U6-sgRNA-EGFP (Addgene, #107721) using Phanta® Max Super Fidelity DNA Polymerase (Vazyme) (Supplementary Table S1). The backbone amplicon was then cut by BsaI-HFv2 (NEB) for overhangs. Spacer oligos (the top strand oligo includes 5' ACCG and 3' GTTTT overhangs, while the bottom strand oligo comprises a 5' CTCTAAAC overhang), pegRNA 3' extension with RNA structural motifs (the top strand oligo included 5' GTGC overhang while the bottom strand oligo included 5' AAAC overhang), the spacer of nick-sgRNA (Supplementary Table S2), and sgRNA scaffold oligos (featuring compatible overhangs) were synthesized (Supplementary Table S1).

### ***Flow cytometry***

Cells were harvested for flow cytometry 3 days after transfection. pegRNAs were cloned into pGL3-U6-sgRNA-EGFP, and GFP signal was detected with flow cytometry. Similarly, sgRNAs were annealed into pGL3-U6-sgRNA-mCherry, and mCherry signal was detected with flow cytometry. Prime editor, together with pegRNA and sgRNA plasmids were transfected simultaneously. Total 10,000 GFP-mCherry double positive cells were collected by FACS for genomic genotyping.

### ***Genomic DNA extraction and genotyping***

The genomic DNA of GFP-mCherry<sup>+</sup> cells was extracted using QuickExtract™ DNA Extraction Solution (Lucigen) according to manufacturer's protocols. The isolated DNA was PCR-amplified with Phanta® Max Super-Fidelity DNA Polymerase (Vazyme). Primers used are listed in (Supplementary Table S3).

### ***Targeted deep-sequencing***

Target sites were amplified with Phanta® Max Super-Fidelity DNA Polymerase (Vazyme) and subjected into high-throughput sequencing (2×150, paired-end) with Illumina Hiseq X Ten platform.

The amplicons were analyzed with CRISPResso2. The primers used for editing efficiency determination are listed in (Supplementary Table S3).

### ***Off-target analysis***

Potential off-target sites were predicted in human genome (GRCh38/hg38) with Cas-OFFinder tools (<http://www.rgenome.net/cas-offinder>), and the region around off-target sites were amplified with Phanta® Max Super-Fidelity DNA Polymerase (Vazyme), and subjected into high-throughput sequencing with Illumina Hiseq X Ten platform. The amplicons were analyzed with CRIPResso2 and the off-target sites are listed in (Supplementary Figure 8A, C and E). Primers used are listed in (Supplementary Table S4).

### ***Analysis of adjusted fold increase***

Adjusted fold increase was calculated according to the methods described in previous study (Song et al., 2021). In some cases, we calculated an adjusted fold increase in which +0.1% was added to both the G-PE and original PE efficiencies in order to avoid mathematical errors and attenuate insignificant fold increases as shown below.

$$\text{Adjusted fold increase} = \frac{\text{G - PE efficiency (\%)} + 0.1 \%}{\text{Original PE (\%)} + 0.1 \%}$$

When we used an adjusted fold increase, we mention this point in the legends to the relevant figures.

### ***Data analysis***

All data were calculated based on three independent experiments, and Students' *t*-test (two-tailed) were used to calculated statistical difference. Mean was showed values  $\pm$  SD.

### ***Data availability***

Targeted amplicon sequencing data has been deposited in the NCBI under BioProject number [SUB10748207](https://www.ncbi.nlm.nih.gov/bioproject/SUB10748207)

### **Supplementary References**

- Liu, Y., Li, X., He, S., et al. (2020). Efficient generation of mouse models with the prime editing system. *Cell Discov.* 6, 27.
- Song, M., Lim, J.M., Min, S., et al. (2021). Generation of a more efficient prime editor 2 by addition of the Rad51 DNA-binding domain. *Nat. Commun.* 12, 5617.

## Supplementary Figures

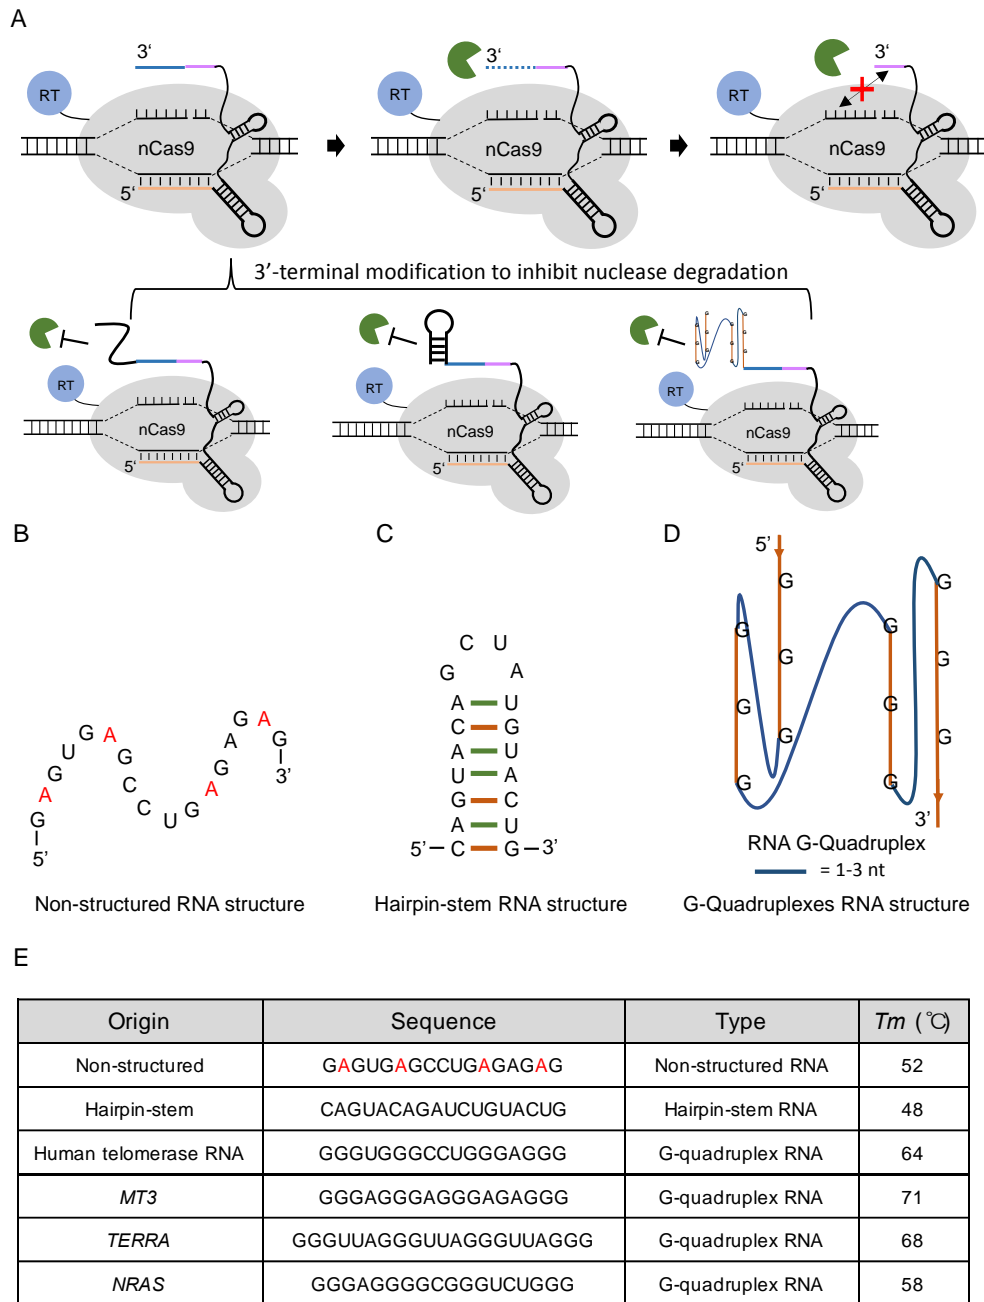

### Supplementary Figure S1. The optimization of pegRNA with RNA structural motifs.

A. Up, a schematic of a PE complex and degradation of the 3' extension of a pegRNA by exonucleases could impede the combination of unwinding ssDNA and 3' extension RNA. Down, a schematic of the pegRNA with three types of designed 3' terminal modification to inhibit nuclease degradation. Green graph represents exonucleases and an original pegRNA consists of spacer (orange), scaffold (black), RT (blue), and PBS (purple).

B. Non-structured RNA structure. Red nucleotides represent mutated base position compared with hTR G-quadruplex sequence.

C. Hairpin-stem RNA structure.

D. G-quadruplexes RNA structure. Blue line respect 1-3 nt base.

E. Characteristic of structured RNA motifs.

A

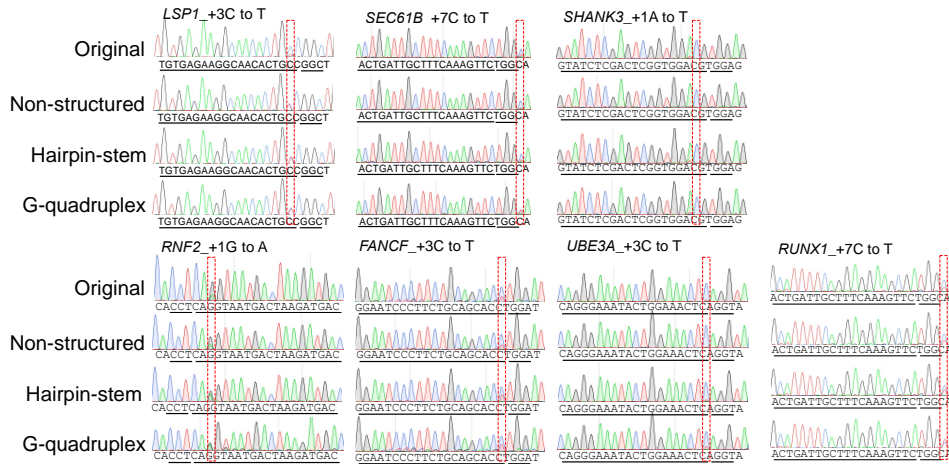

B

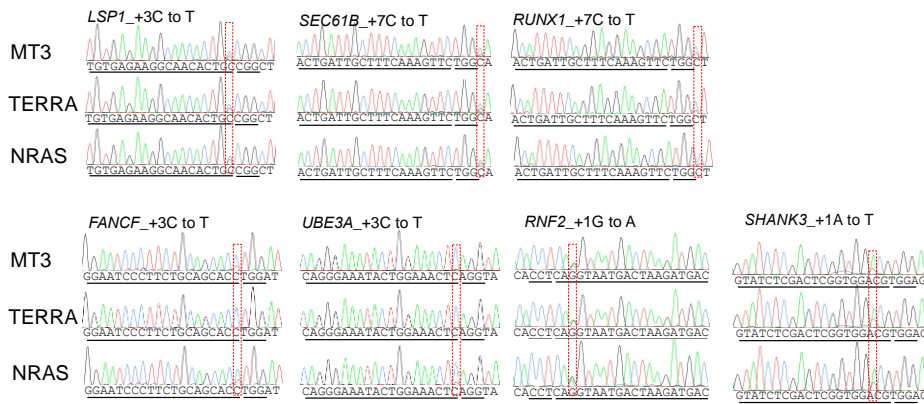

C

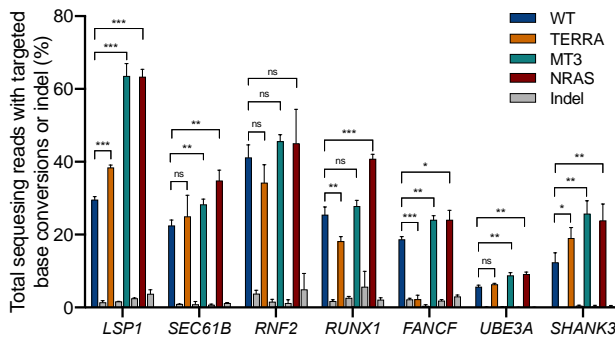

D

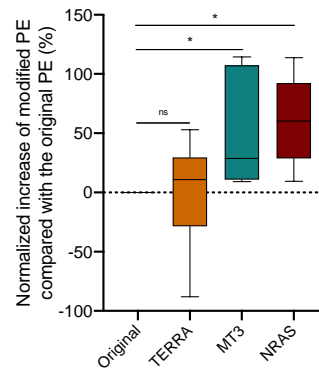

**Supplementary Figure S2. Modified pegRNA with different genomic G-quadruplex also enhances prime editing activity in endogenous sites.**

A. Sanger sequencing of the editing efficiency of endogenous sites with modified pegRNA in HEK293T cell. The frame in red indicated the targeted base.

B. Sanger sequencing of the editing of endogenous sites with *MT3*, *TERRA*, and *NRAS* G-quadruplex modified pegRNAs in HEK293T cell.

C. *MT3*, *TERRA*, and *NRAS* G-quadruplex modified pegRNA observably enhances prime editing activity in major endogenous sites.

D. Prime editing efficiency of modified pegRNA normalized to the increased efficiency of original pegRNA in **A**. Mean values  $\pm$  SD, n = 3 independent experiments. (\* $P < 0.05$ , \*\* $P < 0.005$ , \*\*\* $P < 0.0005$ )

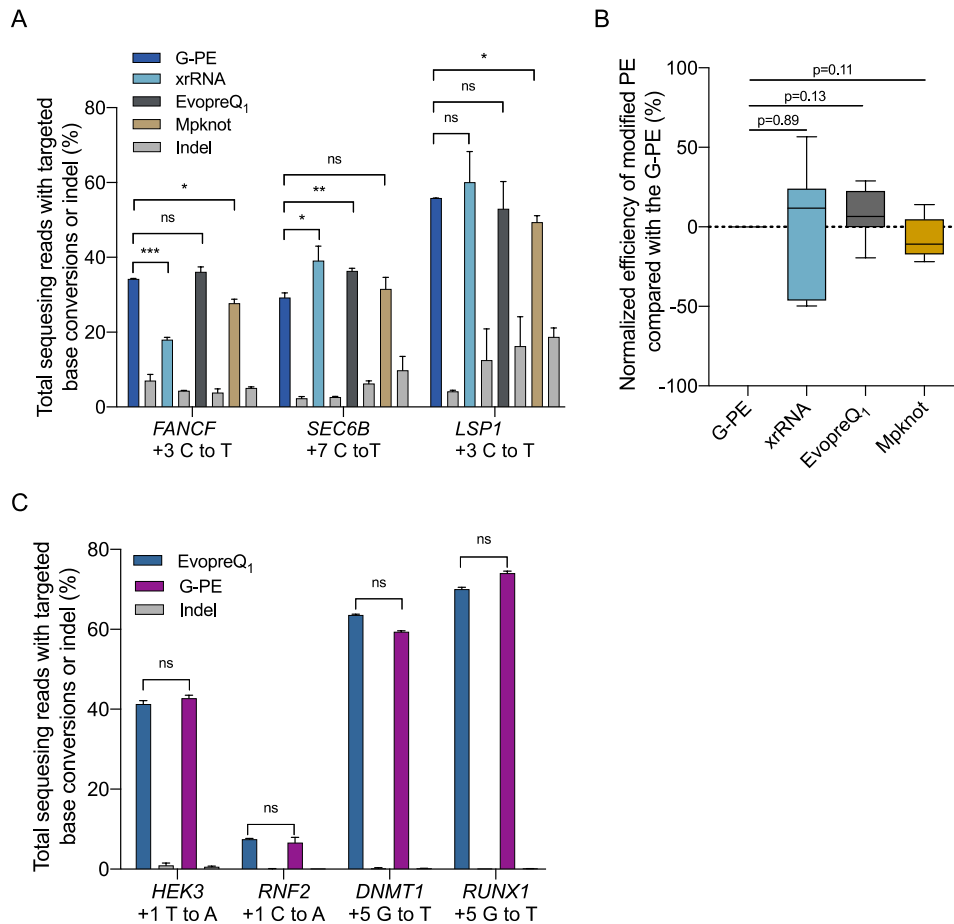

**Supplementary Figure S3. Editing efficiencies of G-PE comparing with other modifications in HEK293T cells.**

A. Analysis of G-PE editing efficiency comparing with evopreQ<sub>1</sub>, mpknot and xrRNA at three endogenous sites.

B. Prime editing efficiency of other modifications normalized to the increased efficiency of G-PE.

C. Analysis of G-PE editing efficiency comparing with evopreQ<sub>1</sub> at four reported sites.

Mean values ± SD, n = 3 independent experiments. (\**P* < 0.05, \*\**P* < 0.005, \*\*\**P* < 0.0005)

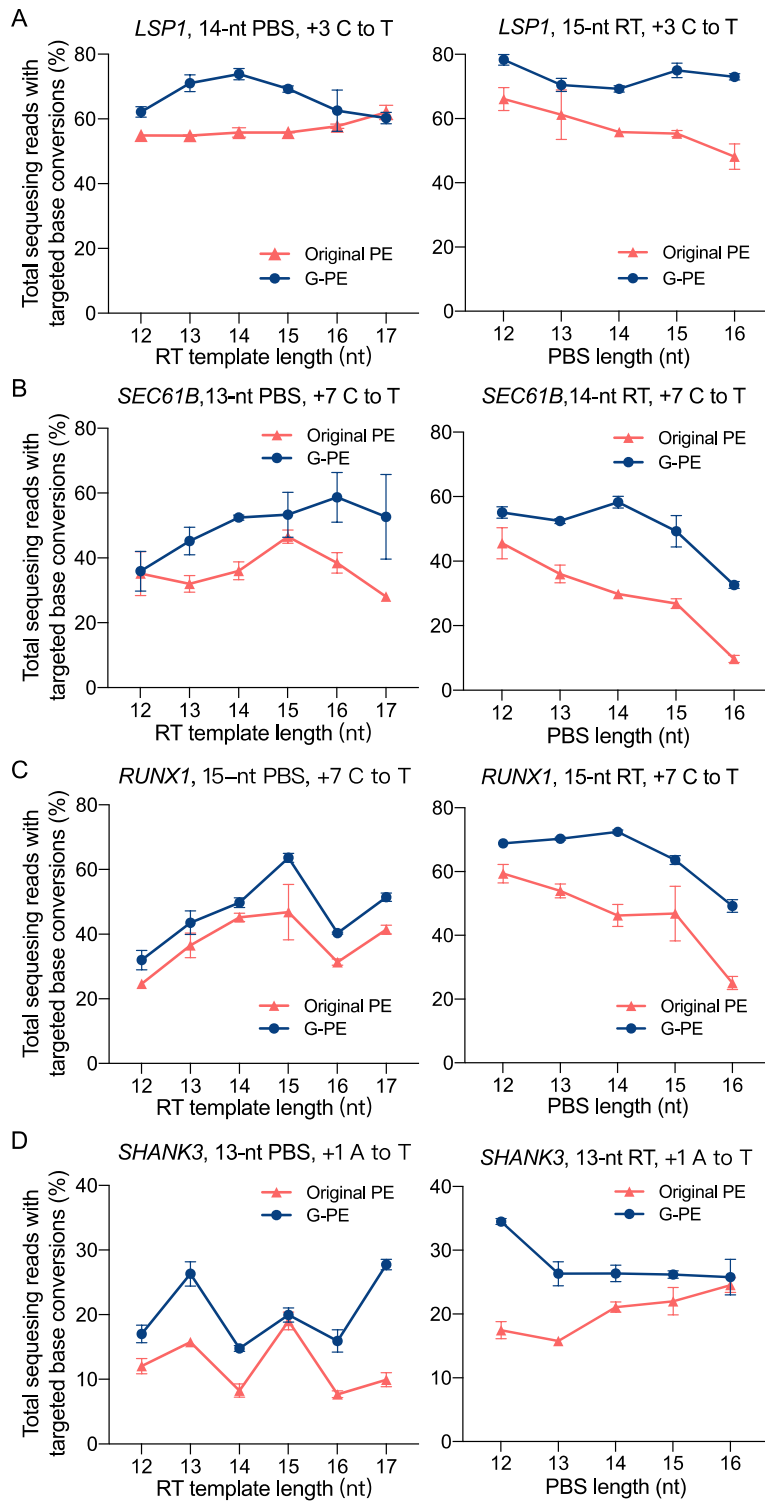

**Supplementary Figure S4. G-PE editing efficiencies with various PBS and RT template lengths at four endogenous sites in HEK293T cells.**

A–D. G-PE editing efficiencies with various PBS and RT template lengths comparing with original PE in *LSP1* (A), *SEC61B* (B), *RUNX1* (C), and *SHANK3* (D) sites.

Mean values  $\pm$  SD, n = 3 independent experiments.

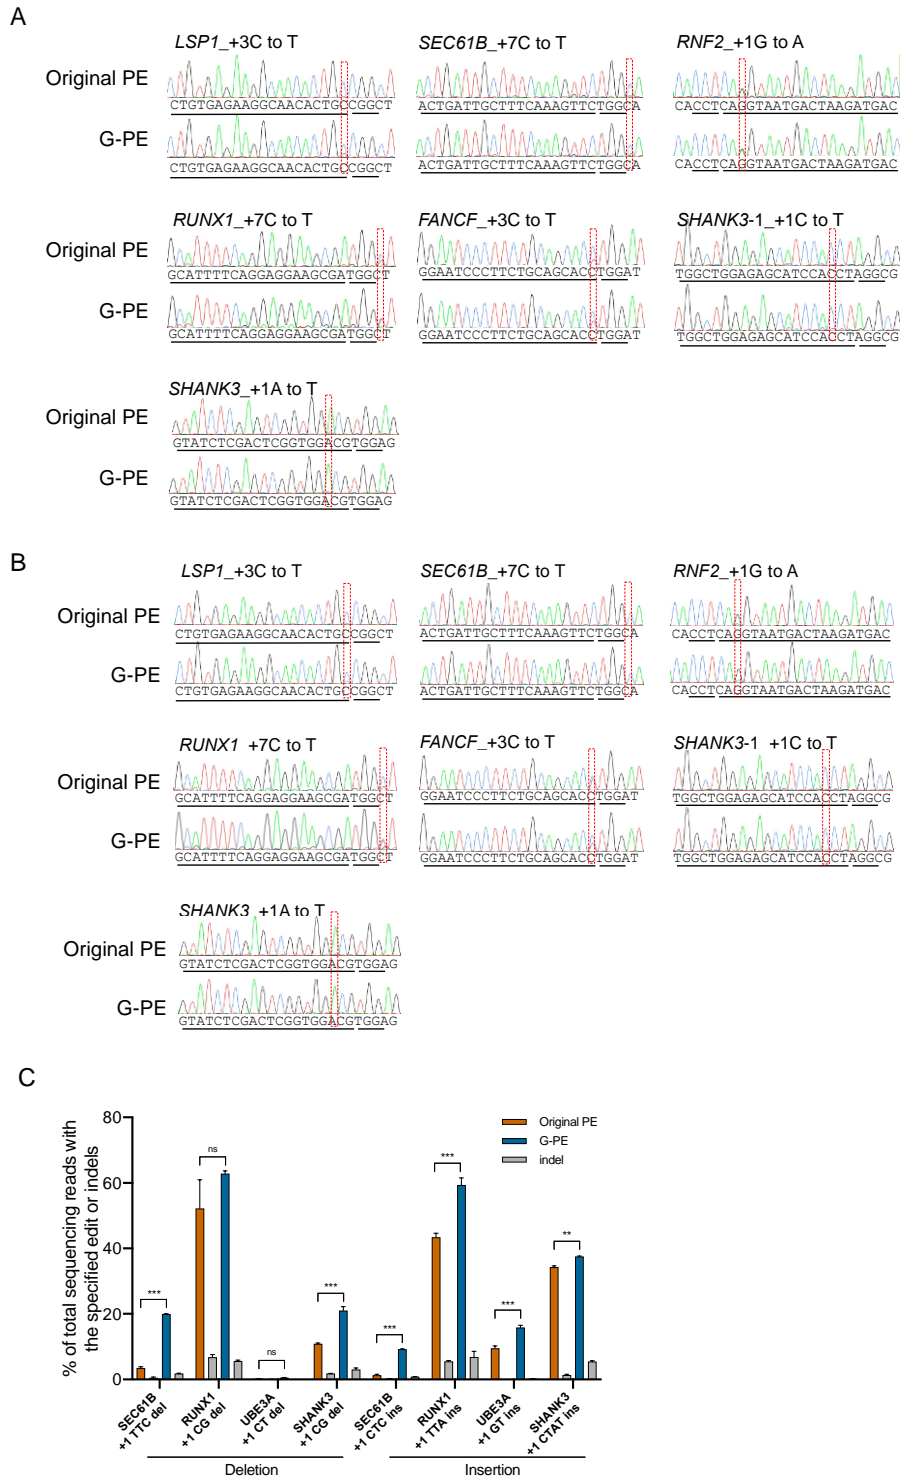

**Supplementary Figure S5. Increasing targeted base substitutions, deletion and insertion efficiency by prime editing with G-PE in HeLa and U2OS cells.**

A and B. Sanger sequencing chromatograms of targeted base conversions with original PE and G-PE of 7 sites in human HeLa (A) and U2OS (B) cell line. The frame in red indicated the targeted base.

C. The comparison of deletion and insertion efficiency of G-PE and original PE at 4 endogenous sites in human HeLa cell lines.

Mean values  $\pm$  SD, n = 3 independent experiments. (\* $P < 0.05$ , \*\* $P < 0.005$ , \*\*\* $P < 0.0005$ )



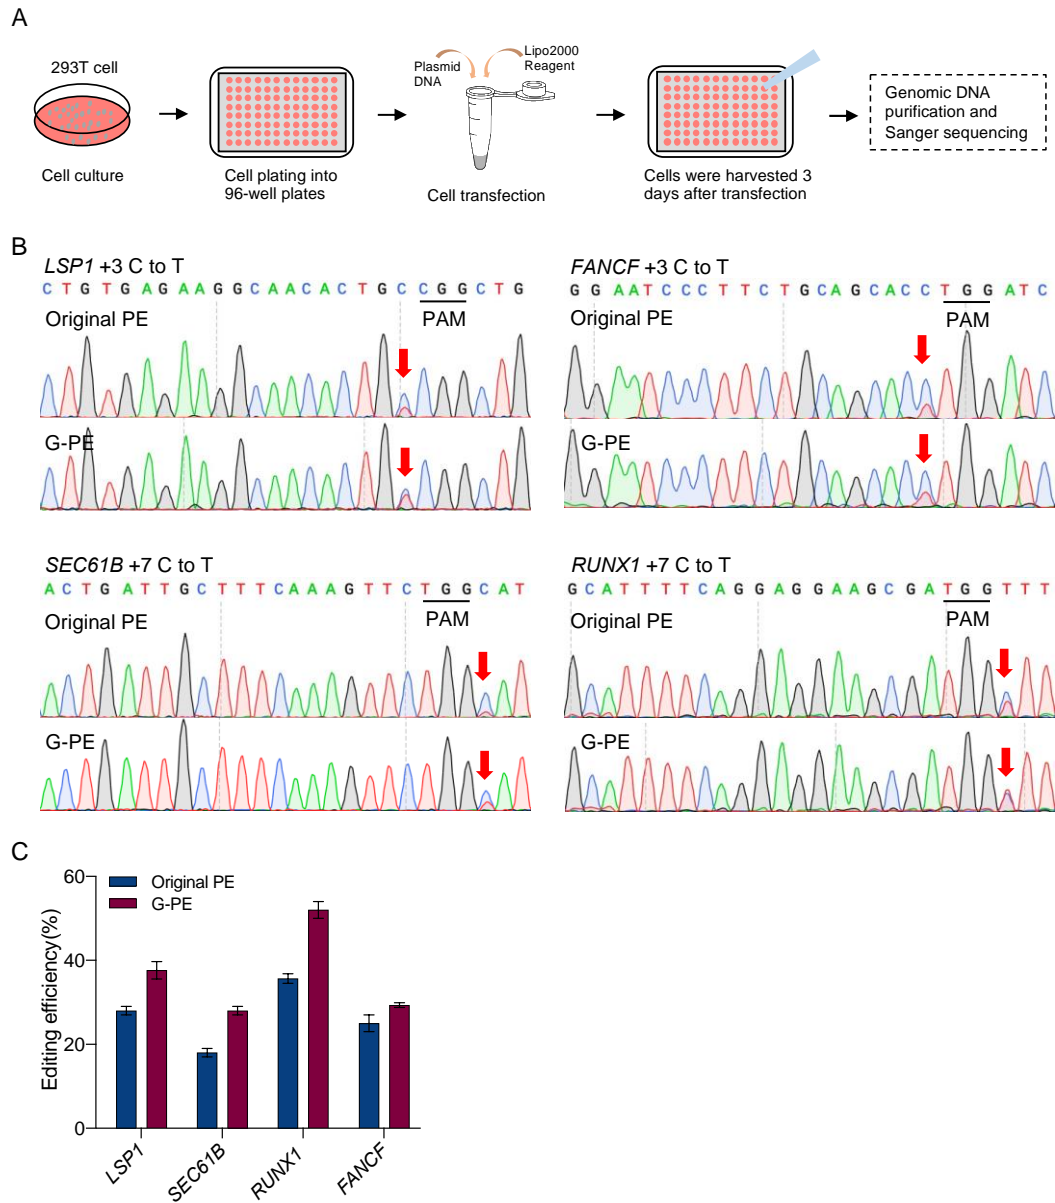

**Supplementary Figure S6. G-PE editing efficiencies without sorting at four endogenous sites in HEK293T cells.**

A. Schematic of our experiment steps to show G-PE editing efficiencies without sorting.

B. Sanger sequencing chromatograms of targeted base conversions with original PE and G-PE without sorting at four endogenous sites. The arrow in red indicated the targeted base.

C. The comparison of efficiency of G-PE and original PE at four endogenous sites without sorting.

Mean values  $\pm$  SD, n = 3 independent experiments.

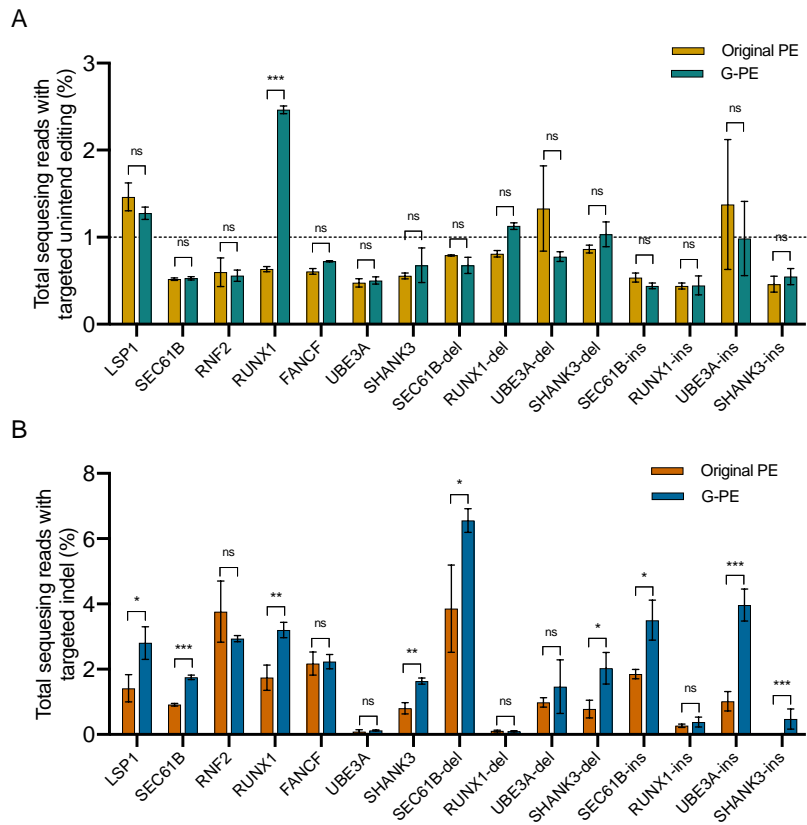

**Supplementary Figure S7. Analysis of unintended edits and indels induced by prime editing with G-PE and original PE.**

A. Analysis of unintended editing induced by prime editing with G-PE and original PE.

B. Analysis of indels induced by prime editing with G-PE and original PE.

Mean values  $\pm$  SD, n = 3 independent experiments. (\* $P$  < 0.05, \*\* $P$  < 0.005, \*\*\* $P$  < 0.0005)

A

| No.         | sgRNA sequence       | Chr.  | Start position | End position | Mismatches |
|-------------|----------------------|-------|----------------|--------------|------------|
| SEC61B-pOT1 | ACTGTTGCTTTaAAgTTC   | chr15 | 91540267       | 91540267     | 3          |
| SEC61B-pOT2 | ACTGATTaTTTCAAAtTTC  | chr20 | 13120456       | 13120456     | 3          |
| SEC61B-pOT3 | AgTGAaTGCTTTcAAAGTTC | chr1  | 77835366       | 77835366     | 3          |
| SEC61B-pOT4 | tCTaATTGCTTTCAgAGTTC | chr2  | 85262708       | 85262708     | 3          |
| SEC61B-pOT5 | ACTGATTGCTgTcAAAgTTC | chr16 | 4727805        | 4727805      | 3          |
| SEC61B-nOT1 | GCaCTGCTggATGACGGAGt | chr5  | 176270613      | 176270613    | 4          |
| SEC61B-nOT2 | GCCgTagTGCATGACGGIGT | chr17 | 78124147       | 78124147     | 4          |
| SEC61B-nOT3 | TCCCTGTtCcTcAtGGAGT  | chr9  | 35399333       | 35399333     | 4          |
| SEC61B-nOT4 | GagtTGCTACATGAaGGAGT | chr11 | 89421041       | 89421041     | 4          |
| SEC61B-nOT5 | GaCCTGCTaCATGAcGaAGT | chr4  | 109556768      | 109556768    | 4          |
| SEC61B-nOT6 | aaCCTGCTACaAGACGGAGt | chr22 | 17998973       | 17998973     | 4          |

B

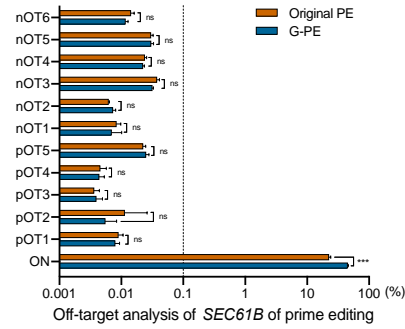

C

| No.       | sgRNA sequence        | Chr.  | Start position | End position | Mismatches |
|-----------|-----------------------|-------|----------------|--------------|------------|
| RNF2-pOT1 | GTCATCcTAGTgcTTACCTG  | chr8  | 755960         | 755960       | 3          |
| RNF2-pOT2 | GTCATCtTAGTCATTaCTG   | chr17 | 17168758       | 17168758     | 3          |
| RNF2-pOT3 | GTAaTATTAGTCATTACcGg  | chr6  | 142890925      | 142890925    | 3          |
| RNF2-pOT4 | GTCATCTgAgcATTACcCTG  | chr6  | 150919928      | 150919928    | 3          |
| RNF2-pOT5 | GTAATCTgAGTCATTaCCTG  | chr10 | 129047187      | 129047187    | 3          |
| RNF2-nOT1 | TCAACCATTtAGCAAAAcT   | chr13 | 71847894       | 71847894     | 3          |
| RNF2-nOT2 | cCAACCATTtAGCAAAAcAc  | chr20 | 3519195        | 3519195      | 3          |
| RNF2-nOT3 | TcAACCATTgAGCAAGaAT   | chr1  | 22721327       | 22721327     | 3          |
| RNF2-nOT4 | TgAAaCCTTtAAGCAAAACAt | chr22 | 29440921       | 29440921     | 3          |

D

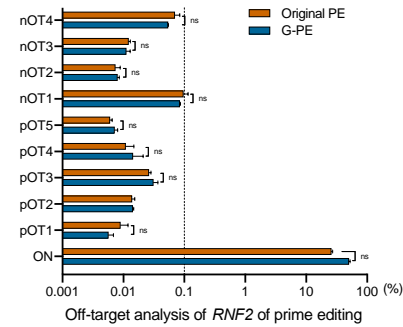

E

| No.        | sgRNA sequence        | Chr.  | Start position | End position | Mismatches |
|------------|-----------------------|-------|----------------|--------------|------------|
| RUNX1-pOT1 | GCATTTTtAGaAGGAAGgGA  | chr1  | 158024825      | 158024825    | 3          |
| RUNX1-pOT2 | GCATTTTtAGGAaGAAgTGA  | chr4  | 140191403      | 140191403    | 3          |
| RUNX1-pOT3 | GtcTTTTcAGGAGGAAGtGA  | chr11 | 111027018      | 111027018    | 3          |
| RUNX1-pOT4 | GCATTTTgAGGAaAAGCgA   | chr3  | 120258754      | 120258754    | 3          |
| RUNX1-pOT5 | GCATTTTcAGGAGGAAtCcA  | chr1  | 29436495       | 29436495     | 2          |
| RUNX1-nOT1 | cTGAAGCACTGTGGGtAcGA  | chr5  | 65031327       | 65031327     | 3          |
| RUNX1-nOT2 | ATGAAGCACTtTGGGTAgcA  | chr10 | 56087088       | 56087088     | 3          |
| RUNX1-nOT3 | ATGtAGaACTGTGGGTAcCcA | chr8  | 2140089        | 2140089      | 3          |
| RUNX1-nOT4 | AaGAAGCAaTGTGGGTAcGa  | chr12 | 30978679       | 30978679     | 4          |
| RUNX1-nOT5 | ATGcAGCcCTGTGGtTcCGA  | chr21 | 46539761       | 46539761     | 4          |

F

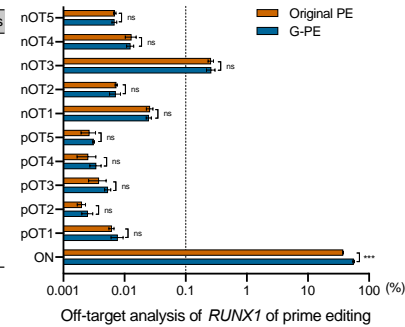

### Supplementary Figure S8. Off-target analysis of prime editing induced by G-PE and original PE in three endogenous sites.

A, B. Information and off-target analysis of *SEC61B*.

C, D. Information and off-target analysis of *RNF2*.

E, F. Information and off-target analysis of *RUNX1*.

The letter in lower case indicates the mismatched sequence. Mean values  $\pm$  SD,  $n = 3$  independent experiments. ( $*P < 0.05$ ,  $**P < 0.005$ ,  $***P < 0.0005$ )

## Supplementary Tables

**Supplementary Table S1. Primers used for constructing of G-quadruplex modified pegRNA plasmids.**

|                    |                                                                         |
|--------------------|-------------------------------------------------------------------------|
| backbone_pegRNA-F  | AGCTAGGTCTCCTTTTTTAAAGAATTCTCGACCTCGAGAC                                |
| backbone_pegRNA-R  | TCTCTCGGTCTCACGGTGTTCGT                                                 |
| sg_scaffold-top    | AGAGCTAGAAATAGCAAGTTAAAATAAGGCTAGTCCGTTATCAACTT<br>GAAAAAGTGGCACCGAGTCG |
| sg_scaffold-bottom | GCACCGACTCGGTGCCACTTTTTCAAGTTGATAACGGACTAGCCTTA<br>TTTTAACTTGCTATTTCTAG |

**Supplementary Table S2. pegRNA target sites, RT template, PBS sequences, modification.**

| pegRNA       | pegRNA target sequence      | Sequence for RT template, PBS and modification        | Nick sg target sequence  | Intended edit |
|--------------|-----------------------------|-------------------------------------------------------|--------------------------|---------------|
| LSP1         | CTGTGAGAAGGCAACACT<br>GCCGG | CAGCCCCAGCCGACAGTGTTCCTTCTCA                          | CCTCTCTGGGCC<br>TTTGGGT  | +3 C to T     |
| SEC61B-T1    | ACTGATTGCTTTCAAAGTT<br>CTGG | GTGTTTCATACCAGAACTTTGAAAGCAAT                         | GCCCTGCTACATG<br>ACGGAGT | +7 C to T     |
| RNF2         | CCTCAGGTAATGACTAAG<br>ATGAC | AACGAACACCTCAAGTAATGACTAAGATG                         | TCAACCATTAAGCA<br>AAACAT | +1 G to A     |
| RUNX1-T1     | GCATTTTCAGGAGGAAGC<br>GATGG | TGTCTGAAACCATCGCTTCCTCCTGAAAAAT                       | ATGAAGCACTGTG<br>GGTACGA | +7 C to T     |
| FANCF        | GGAATCCCTTCTGCAGCA<br>CCTGG | AAAAGCGATCCAAGTGCTGCAGAAGGGA                          | GGGGTCCCAGGTG<br>CTGACGT | +3 C to T     |
| UBE3A-T1     | CAGGGAAATACTGGAAC<br>TCAGG  | ATGAGTACCTAAGTTCCAGTATTTCC                            | ACCACTAATCCCC<br>AGATTTT | +3 C to T     |
| SHANK3       | GTATCTCGAGTCGGTGGA<br>CGTGG | ACACCCTCCACGACCACCGACTCGAG                            | AGAACGACCTCAC<br>CTCGATG | +1 A to T     |
| LSP1-NS      | CTGTGAGAAGGCAACACT<br>GCCGG | CAGCCCCAGCCGACAGTGTTCCTTCTCAGA<br>GTGAGCCTGAGAGAG     | CCTCTCTGGGCC<br>TTTGGGT  | +3 C to T     |
| SEC61B-T1-NS | ACTGATTGCTTTCAAAGTT<br>CTGG | GTGTTTCATACCAGAACTTTGAAAGCAATGAGT<br>GAGCCTGAGAGAG    | GCCCTGCTACATG<br>ACGGAGT | +7 C to T     |
| RNF2-NS      | CCTCAGGTAATGACTAAG<br>ATGAC | AACGAACACCTCAAGTAATGACTAAGATGGGA<br>GTGAGCCTGAGAGAG   | TCAACCATTAAGCA<br>AAACAT | +1 G to A     |
| RUNX1-T1-NS  | GCATTTTCAGGAGGAAGC<br>GATGG | TGTCTGAAACCATCGCTTCCTCCTGAAAAATGA<br>GTGAGCCTGAGAGAG  | ATGAAGCACTGTG<br>GGTACGA | +7 C to T     |
| FANCF-NS     | GGAATCCCTTCTGCAGCA<br>CCTGG | AAAAGCGATCCAAGTGCTGCAGAAGGGAGA<br>GTGAGCCTGAGAGAG     | GGGGTCCCAGGTG<br>CTGACGT | +3 C to T     |
| UBE3A-T1-NS  | CAGGGAAATACTGGAAC<br>TCAGG  | ATGAGTACCTAAGTTCCAGTATTTCCAGTGA<br>GCCTGAGAGAG        | ACCACTAATCCCC<br>AGATTTT | +3 C to T     |
| SHANK3-NS    | GTATCTCGAGTCGGTGGA<br>CGTGG | ACACCCTCCACGACCACCGACTCGAGGAGT<br>GAGCCTGAGAGAG       | AGAACGACCTCAC<br>CTCGATG | +1 A to T     |
| LSP1-HS      | CTGTGAGAAGGCAACACT<br>GCCGG | CAGCCCCAGCCGACAGTGTTCCTTCTCACA<br>GTACAGAUCTGTACTG    | CCTCTCTGGGCC<br>TTTGGGT  | +3 C to T     |
| SEC61B-T1-HS | ACTGATTGCTTTCAAAGTT<br>CTGG | GTGTTTCATACCAGAACTTTGAAAGCAATCAGT<br>ACAGAUCTGTACTG   | GCCCTGCTACATG<br>ACGGAGT | +7 C to T     |
| RNF2-HS      | CCTCAGGTAATGACTAAG<br>ATGAC | AACGAACACCTCAAGTAATGACTAAGATGCA<br>GTACAGAUCTGTACTG   | TCAACCATTAAGCA<br>AAACAT | +1 G to A     |
| RUNX1-T1-HS  | GCATTTTCAGGAGGAAGC<br>GATGG | TGTCTGAAACCATCGCTTCCTCCTGAAAAATCA<br>GTACAGAUCTGTACTG | ATGAAGCACTGTG<br>GGTACGA | +7 C to T     |
| FANCF-HS     | GGAATCCCTTCTGCAGCA<br>CCTGG | AAAAGCGATCCAAGTGCTGCAGAAGGGACA<br>GTACAGAUCTGTACTG    | GGGGTCCCAGGTG<br>CTGACGT | +3 C to T     |
| UBE3A-T1-HS  | CAGGGAAATACTGGAAC<br>TCAGG  | ATGAGTACCTAAGTTCCAGTATTTCCAGTAC<br>AGAUCTGTACTG       | ACCACTAATCCCC<br>AGATTTT | +3 C to T     |
| SHANK3-HS    | GTATCTCGAGTCGGTGGA<br>CGTGG | ACACCCTCCACGACCACCGACTCGAGCAGTA<br>CAGAUCTGTACTG      | AGAACGACCTCAC<br>CTCGATG | +1 A to T     |

|                 |                             |                                                         |                          |            |
|-----------------|-----------------------------|---------------------------------------------------------|--------------------------|------------|
| LSP1-hTR        | CTGTGAGAAGGCAACACT<br>GCCGG | CAGCCCCAGCCGACAGTGTTCCTTCTCAGG<br>GTGGCCCTGGGAGGG       | CCTCTCTGGGCC<br>TTTGGGT  | +3 C to T  |
| SEC61B-T1-hTR   | ACTGATTGCTTTCAAAGTT<br>CTGG | GTGTTTCATACCAGAACTTTGAAAGCAATGGG<br>TGGCCCTGGGAGGG      | GCCCTGCTACATG<br>ACGGAGT | +7 C to T  |
| RNF2-hTR        | CCTCAGGTAATGACTAAG<br>ATGAC | AACGAACACCTCAAAGTAATGACTAAGATGGG<br>GTGGCCCTGGGAGGG     | TCAACCATTAAGCA<br>AAACAT | +1 G to A  |
| RUNX1-T1-hTR    | GCATTTTCAGGAGGAAGC<br>GATGG | TGTCTGAAACCATCGCTTCCTCCTGAAAATG<br>GGTGGCCCTGGGAGGG     | ATGAAGCACTGTG<br>GGTACGA | +7 C to T  |
| FANCF-hTR       | GGAATCCCTTCTGCAGCA<br>CCTGG | AAAAGCGATCCAAGTCTGCAGAAGGGAGG<br>GTGGCCCTGGGAGGG        | GGGGTCCCAGGTG<br>CTGACGT | +3 C to T  |
| UBE3A -hTR      | CAGGGAAATACTGAAAC<br>TCAGG  | ATGAGTACCTAAGTTCCAGTATTTCCGGGTG<br>GGCCTGGGAGGG         | ACCACTAATCCCC<br>AGATTTT | +3 C to T  |
| SHANK3-hTR      | GTATCTCGAGTCGGTGGA<br>CGTGG | ACACCCTCCACGACCACCGACTCGAGGGGT<br>GGCCCTGGGAGGG         | AGAACGACCTCAC<br>CTCGATG | +1 A to T  |
| LSP1-MT3        | CTGTGAGAAGGCAACACT<br>GCCGG | CAGCCCCAGCCGACAGTGTTCCTTCTCAGG<br>GAGGGAGGGAGAGGG       | CCTCTCTGGGCC<br>TTTGGGT  | +3 C to T  |
| SEC61B-T1-MT3   | ACTGATTGCTTTCAAAGTT<br>CTGG | GTGTTTCATACCAGAACTTTGAAAGCAATGGG<br>AGGGAGGGAGAGGG      | GCCCTGCTACATG<br>ACGGAGT | +7 C to T  |
| RNF2-MT3        | CCTCAGGTAATGACTAAG<br>ATGAC | AACGAACACCTCAAAGTAATGACTAAGATGGG<br>GAGGGAGGGAGAGGG     | TCAACCATTAAGCA<br>AAACAT | +1 G to A  |
| RUNX1-T1-MT3    | GCATTTTCAGGAGGAAGC<br>GATGG | TGTCTGAAACCATCGCTTCCTCCTGAAAATG<br>GGAGGGAGGGAGAGGG     | ATGAAGCACTGTG<br>GGTACGA | +7 C to T  |
| FANCF-MT3       | GGAATCCCTTCTGCAGCA<br>CCTGG | AAAAGCGATCCAAGTCTGCAGAAGGGAGG<br>GAGGGAGGGAGAGGG        | GGGGTCCCAGGTG<br>CTGACGT | +3 C to T  |
| UBE3A-T1-MT3    | CAGGGAAATACTGAAAC<br>TCAGG  | ATGAGTACCTAAGTTCCAGTATTTCCGGGAG<br>GGAGGGAGAGGG         | ACCACTAATCCCC<br>AGATTTT | +3 C to T  |
| SHANK3 -MT3     | GTATCTCGAGTCGGTGGA<br>CGTGG | ACACCCTCCACGACCACCGACTCGAGGGGA<br>GGGAGGGAGAGGG         | AGAACGACCTCAC<br>CTCGATG | +1 A to T  |
| LSP1-TERRA      | CTGTGAGAAGGCAACACT<br>GCCGG | CAGCCCCAGCCGACAGTGTTCCTTCTCAGG<br>GTTAGGGTTAGGGTTAGGG   | CCTCTCTGGGCC<br>TTTGGGT  | +3 C to T  |
| SEC61B-T1-TERRA | ACTGATTGCTTTCAAAGTT<br>CTGG | GTGTTTCATACCAGAACTTTGAAAGCAATGGG<br>TTAGGGTTAGGGTTAGGG  | GCCCTGCTACATG<br>ACGGAGT | +7 C to T  |
| RNF2-TERRA      | CCTCAGGTAATGACTAAG<br>ATGAC | AACGAACACCTCAAAGTAATGACTAAGATGGG<br>GTTAGGGTTAGGGTTAGGG | TCAACCATTAAGCA<br>AAACAT | +1 G to A  |
| RUNX1-T1-TERRA  | GCATTTTCAGGAGGAAGC<br>GATGG | TGTCTGAAACCATCGCTTCCTCCTGAAAATG<br>GGTTAGGGTTAGGGTTAGGG | ATGAAGCACTGTG<br>GGTACGA | +7 C to T  |
| FANCF-TERRA     | GGAATCCCTTCTGCAGCA<br>CCTGG | AAAAGCGATCCAAGTCTGCAGAAGGGAGG<br>GTTAGGGTTAGGGTTAGGG    | GGGGTCCCAGGTG<br>CTGACGT | +3 C to T  |
| UBE3A-T1-TERRA  | CAGGGAAATACTGAAAC<br>TCAGG  | ATGAGTACCTAAGTTCCAGTATTTCCGGGTTA<br>GGGTTAGGGTTAGGG     | ACCACTAATCCCC<br>AGATTTT | +3 C to T  |
| SHANK3-TERRA    | GTATCTCGAGTCGGTGGA<br>CGTGG | ACACCCTCCACGACCACCGACTCGAGGGGT<br>TAGGGTTAGGGTTAGGG     | AGAACGACCTCAC<br>CTCGATG | +1 A to T  |
| LSP1-NRAS       | CTGTGAGAAGGCAACACT<br>GCCGG | CAGCCCCAGCCGACAGTGTTCCTTCTCAGG<br>GAGGGGCGGGTCTGGG      | CCTCTCTGGGCC<br>TTTGGGT  | +3 C to T  |
| SEC61B-T1-NRAS  | ACTGATTGCTTTCAAAGTT<br>CTGG | GTGTTTCATACCAGAACTTTGAAAGCAATGGG<br>AGGGGCGGGTCTGGG     | GCCCTGCTACATG<br>ACGGAGT | +7 C to T  |
| RNF2-NRAS       | CCTCAGGTAATGACTAAG<br>ATGAC | AACGAACACCTCAAAGTAATGACTAAGATGGG<br>GAGGGGCGGGTCTGGG    | TCAACCATTAAGCA<br>AAACAT | +1 G to A  |
| RUNX1-T1-NRAS   | GCATTTTCAGGAGGAAGC<br>GATGG | TGTCTGAAACCATCGCTTCCTCCTGAAAATG<br>GGAGGGGCGGGTCTGGG    | ATGAAGCACTGTG<br>GGTACGA | +7 C to T  |
| FANCF-NRAS      | GGAATCCCTTCTGCAGCA<br>CCTGG | AAAAGCGATCCAAGTCTGCAGAAGGGAGG<br>GAGGGGCGGGTCTGGG       | GGGGTCCCAGGTG<br>CTGACGT | +3 C to T  |
| UBE3A-T1-NRAS   | CAGGGAAATACTGAAAC<br>TCAGG  | ATGAGTACCTAAGTTCCAGTATTTCCGGGAG<br>GGGCGGGTCTGGG        | ACCACTAATCCCC<br>AGATTTT | +3 C to T  |
| SHANK3 -NRAS    | GTATCTCGAGTCGGTGGA<br>CGTGG | ACACCCTCCACGACCACCGACTCGAGGGGA<br>GGGGGCGGGTCTGGG       | AGAACGACCTCAC<br>CTCGATG | +1 A to T  |
| SEC61B-T2       | ACTGATTGCTTTCAAAGTT<br>CTGG | GTGTTTCATGCCACTTTGAAAGCAAT                              | GCCCTGCTACATG<br>ACGGAGT | +1 TTC del |
| RUNX1-T2        | GCATTTTCAGGAGGAAGC<br>GATGG | TGTCTGAAGCCATCTTCCTCCTGAAAAT                            | ATGAAGCACTGTG<br>GGTACGA | +1 CG del  |
| UBE3A-T2        | CAGGGAAATACTGAAAC<br>TCAGG  | ATGAGTACCTGTTCCAGTATTTT                                 | ACCACTAATCCCC<br>AGATTTT | +1 CT del  |
| SHANK3-T2       | GTATCTCGAGTCGGTGGA<br>CGTGG | ACACCCTCCATCCACCGACTCGAG                                | AGAACGACCTCAC<br>CTCGATG | +2 CG del  |
| SEC61B-T3       | ACTGATTGCTTTCAAAGTT<br>CTGG | GTGTTTCATGCCAGAACTTTGAAAGCAAT                           | GCCCTGCTACATG<br>ACGGAGT | +1 CTC ins |

|                      |                             |                                                                                                           |                           |             |
|----------------------|-----------------------------|-----------------------------------------------------------------------------------------------------------|---------------------------|-------------|
| RUNX1-T3             | GCATTTTCAGGAGGAAGC<br>GATGG | TGTCTGAAGCCATCGTAACTTCCTCTGAAAA<br>T                                                                      | ATGAAGCACTGTG<br>GGTACGA  | +1 TTA ins  |
| UBE3A-T3             | CAGGGAAATACTGGAAAC<br>TCAGG | ATGAGTACCTGAGGTTTCCAGTATTTTC                                                                              | ACCACTAATCCCC<br>AGATTTT  | +1 GT ins   |
| SHANK3-T3            | GTATCTCGAGTCGGTGA<br>CGTGG  | ACACCCTCCACGTATAGCCACCGACTCGAG                                                                            | AGAACGACCTCAC<br>CTCGATG  | +1 CTAT ins |
| SEC61B-T2-<br>hTR    | ACTGATTGCTTTCAAAGTT<br>CTGG | GTGTTTCATGCCACTTTGAAAGCAATGGGTGG<br>GCCTGGGAGGG                                                           | GCCCTGCTACATG<br>ACGGAGT  | +1 TTC del  |
| RUNX1-T2-<br>hTR     | GCATTTTCAGGAGGAAGC<br>GATGG | TGTCTGAAGCCATCTTCCTCTGAAAAATGGG<br>TGGGCCTGGGAGGG                                                         | ATGAAGCACTGTG<br>GGTACGA  | +1 CG del   |
| UBE3A-T2-<br>hTR     | CAGGGAAATACTGGAAAC<br>TCAGG | ATGAGTACCTGTTCCAGTATTTCCGGGTGGG<br>CCTGGGAGGG                                                             | ACCACTAATCCCC<br>AGATTTT  | +1 CT del   |
| SHANK3-T2-<br>hTR    | GTATCTCGAGTCGGTGA<br>CGTGG  | ACACCCTCCATCCACCGACTCGAGGGGTGG<br>GCCTGGGAGGG                                                             | AGAACGACCTCAC<br>CTCGATG  | +2 CG del   |
| SEC61B-T3-<br>hTR    | ACTGATTGCTTTCAAAGTT<br>CTGG | GTGTTTCATGCCAGAACTTTGAAAGCAATGGG<br>TGGGCCTGGGAGGG                                                        | GCCCTGCTACATG<br>ACGGAGT  | +1 CTC ins  |
| RUNX1-T3-<br>hTR     | GCATTTTCAGGAGGAAGC<br>GATGG | TGTCTGAAGCCATCGTAACTTCCTCTGAAAA<br>TGGGTGGCCTGGGAGGG                                                      | ATGAAGCACTGTG<br>GGTACGA  | +1 TTA ins  |
| UBE3A-T3-<br>hTR     | CAGGGAAATACTGGAAAC<br>TCAGG | ATGAGTACCTGAGGTTTCCAGTATTTCCGGG<br>TGGGCCTGGGAGGG                                                         | ACCACTAATCCCC<br>AGATTTT  | +1 GT ins   |
| SHANK3-T3-<br>hTR    | GTATCTCGAGTCGGTGA<br>CGTGG  | ACACCCTCCACGTATAGCCACCGACTCGAGG<br>GGTGGGCCTGGGAGGG                                                       | AGAACGACCTCAC<br>CTCGATG  | +1 CTAT ins |
| FANCF-<br>xrRNA      | GGAATCCCTTCTGCAGCA<br>CCTGG | AAAAGCGATCCAAGTGCTGCAGAAGGGATCT<br>CTCTCGCGTAACCTCCATCCGAGTTGCAAGA<br>GAGGGAAACGCAGTCTC                   | GGGGTCCCAGGTG<br>CTGACGT  | +3 C to T   |
| FANCF-<br>evopreQ1   | GGAATCCCTTCTGCAGCA<br>CCTGG | AAAAGCGATCCAAGTGCTGCAGAAGGGATCT<br>CTCTCTTGACGCGGTTCTATCTAGTTACGCG<br>TTAAACCAACTAGAAA                    | GGGGTCCCAGGTG<br>CTGACGT  | +3 C to T   |
| FANCF-<br>mpknot     | GGAATCCCTTCTGCAGCA<br>CCTGG | AAAAGCGATCCAAGTGCTGCAGAAGGGATCT<br>CTCTCGGGTCAGGAGCCCCCCCCCTGAACC<br>CAGGATAACCCTCAAAGTCGGGGGGCAACC<br>C  | GGGGTCCCAGGTG<br>CTGACGT  | +3 C to T   |
| SEC61B-<br>xrRNA     | ACTGATTGCTTTCAAAGTT<br>CTGG | GTGTTTCATACCAGAACTTTGAAAGCAAT<br>TCTCTCTCGCGTAACCTCCATCCGAGTTGCA<br>AGAGAGGGAAACGCAGTCTC                  | GCCCTGCTACATG<br>ACGGAGT  | +7 C to T   |
| SEC61B-<br>evopreQ1  | ACTGATTGCTTTCAAAGTT<br>CTGG | GTGTTTCATACCAGAACTTTGAAAGCAAT<br>TCTCTCTCTTGACGCGGTTCTATCTAGTTACG<br>CGTTAAACCAACTAGAAA                   | GCCCTGCTACATG<br>ACGGAGT  | +7 C to T   |
| SEC61B-<br>mpknot    | ACTGATTGCTTTCAAAGTT<br>CTGG | GTGTTTCATACCAGAACTTTGAAAGCAAT<br>TCTCTCTCGGGTCAGGAGCCCCCCCCCTGAA<br>CCCAGGATAACCCTCAAAGTCGGGGGGCAA<br>CCC | GCCCTGCTACATG<br>ACGGAGT  | +7 C to T   |
| UBE3A-<br>xrRNA      | CAGGGAAATACTGGAAAC<br>TCAGG | ATGAGTACCTAAGTTTCCAGTATTTTC<br>TCTCTCTCGCGTAACCTCCATCCGAGTTGCA<br>AGAGAGGGAAACGCAGTCTC                    | ACCACTAATCCCC<br>AGATTTT  | +3 C to T   |
| UBE3A-<br>evopreQ1   | CAGGGAAATACTGGAAAC<br>TCAGG | ATGAGTACCTAAGTTTCCAGTATTTTC<br>TCTCTCTCTTGACGCGGTTCTATCTAGTTACG<br>CGTTAAACCAACTAGAAA                     | ACCACTAATCCCC<br>AGATTTT  | +3 C to T   |
| UBE3A-<br>mpknot     | CAGGGAAATACTGGAAAC<br>TCAGG | ATGAGTACCTAAGTTTCCAGTATTTTC<br>TCTCTCTCGGGTCAGGAGCCCCCCCCCTGAA<br>CCCAGGATAACCCTCAAAGTCGGGGGGCAA<br>CCC   | ACCACTAATCCCC<br>AGATTTT  | +3 C to T   |
| LSP1- xrRNA          | CTGTGAGAAGGCAACACT<br>GCCGG | CAGCCCCAGCCGACAGTGTGCTTCTCATC<br>TCTCTCGCGTAACCTCCATCCGAGTTGCAAG<br>AGAGGGAAACGCAGTCTC                    | CCTCTCTGGGCC<br>TTTGGGT   | +3 C to T   |
| LSP1-<br>evopreQ1    | CTGTGAGAAGGCAACACT<br>GCCGG | CAGCCCCAGCCGACAGTGTGCTTCTCATC<br>TCTCTCTTGACGCGGTTCTATCTAGTTACG<br>GTTAAACCAACTAGAAA                      | CCTCTCTGGGCC<br>TTTGGGT   | +3 C to T   |
| LSP1-mpknot          | CTGTGAGAAGGCAACACT<br>GCCGG | CAGCCCCAGCCGACAGTGTGCTTCTCATC<br>TCTCTCGGGTCAGGAGCCCCCCCCCTGAA<br>CCAGGATAACCCTCAAAGTCGGGGGGCAA<br>CC     | CCTCTCTGGGCC<br>TTTGGGT   | +3 C to T   |
| HEK3-D1-<br>evopreQ1 | GGCCCACTGAGCACG<br>TGATGG   | TGGAGGAAGCAGGGCTTCCTTTCTCTGCCA<br>TCTCGTCTCAGTCTGTCTCTCCGCGGTT<br>CTATCTAGTTACGCGTTAAACCAACTAGAA          | GTCAACCAGTATC<br>CCGGTGC  | +1 T to A   |
| RNF2-D1-<br>evopreQ1 | GTCATCTTAGTCATTACCT<br>GAGG | AACGAAACCTCATGTAATGACTAAGATGTCA<br>TCTCTCGCGGTTCTATCTAGTTACGCGTTAA<br>CCAACACTAGAA                        | GTCAACCATTAAG<br>CAAAACAT | +1 C to A   |

|                   |                                    |                                                                                   |                           |           |
|-------------------|------------------------------------|-----------------------------------------------------------------------------------|---------------------------|-----------|
| RUNX1-D1-evopreQ1 | GCATTTTCAGGAGGAAGC<br><b>GACGG</b> | TGTCTGAAGCAATCGCTTCTCCTGAAAATAA<br>CTCTCTCGCGTTCTATCTAGTTACGCGTTAA<br>ACCAACTAGAA | GATGAAGCACTGT<br>GGGTACGA | +5 G to T |
| DNMT1-D1-evopreQ1 | GATTCCTGGTGCCAGAAA<br><b>CATGG</b> | GTCACCACTGTTTCTGGCACCAGGACCTCTT<br>CTCGCGGTTCTATCTAGTTACGCGTTAAACC<br>AACTAGAA    | GCCCTTCAGCTAA<br>AATAAAGG | +5 G to T |
| HEK3-D1-hTR       | GGCCAGACTGAGCACG<br>TGAT <b>GG</b> | TGGAGGAAGCAGGGCTTCTTTCTCTGCCA<br>TCTCGTGCTCAGTCTGTGGTGGGCTGGG<br>AGGG             | GTCACCAAGTATC<br>CCGGTGC  | +1 T to A |
| RNF2-D1-hTR       | GTCATCTTAGTCATTACCT<br><b>GAGG</b> | AACGAACACCTCATGTAATGACTAAGATGGG<br>GTGGGCCTGGGAGGG                                | GTCACCATTAAG<br>CAAAACAT  | +1 C to A |
| RUNX1-D1-hTR      | GCATTTTCAGGAGGAAGC<br><b>GACGG</b> | TGTCTGAAGCAATCGCTTCTCCTGAAAATG<br>GGTGGGCTGGGAGGG                                 | GATGAAGCACTGT<br>GGGTACGA | +5 G to T |
| DNMT1-D1-hTR      | GATTCCTGGTGCCAGAAA<br><b>CATGG</b> | GTCACCACTGTTTCTGGCACCAGGAGGGTG<br>GGCCTGGGAGGG                                    | GCCCTTCAGCTAA<br>AATAAAGG | +5 G to T |
| LSP1-RT17         | CTGTGAGAAGGCAACACT<br><b>GCCGG</b> | CCCAGCCCCAGCCGACAGTGTTCCTTCTCA                                                    | CCTCTCTGGGCC<br>TTTGGGT   | +3 C to T |
| LSP1-RT16         | CTGTGAGAAGGCAACACT<br><b>GCCGG</b> | CCAGCCCCAGCCGACAGTGTTCCTTCTCA                                                     | CCTCTCTGGGCC<br>TTTGGGT   | +3 C to T |
| LSP1-RT15         | CTGTGAGAAGGCAACACT<br><b>GCCGG</b> | CAGCCCCAGCCGACAGTGTTCCTTCTCA                                                      | CCTCTCTGGGCC<br>TTTGGGT   | +3 C to T |
| LSP1-RT14         | CTGTGAGAAGGCAACACT<br><b>GCCGG</b> | AGCCCCAGCCGACAGTGTTCCTTCTCA                                                       | CCTCTCTGGGCC<br>TTTGGGT   | +3 C to T |
| LSP1-RT13         | CTGTGAGAAGGCAACACT<br><b>GCCGG</b> | GCCCCAGCCGACAGTGTTCCTTCTCA                                                        | CCTCTCTGGGCC<br>TTTGGGT   | +3 C to T |
| LSP1-RT12         | CTGTGAGAAGGCAACACT<br><b>GCCGG</b> | CCCCAGCCGACAGTGTTCCTTCTCA                                                         | CCTCTCTGGGCC<br>TTTGGGT   | +3 C to T |
| LSP1-PBS16        | CTGTGAGAAGGCAACACT<br><b>GCCGG</b> | CAGCCCCAGCCGACAGTGTTCCTTCTCACA                                                    | CCTCTCTGGGCC<br>TTTGGGT   | +3 C to T |
| LSP1-PBS15        | CTGTGAGAAGGCAACACT<br><b>GCCGG</b> | CAGCCCCAGCCGACAGTGTTCCTTCTCAC                                                     | CCTCTCTGGGCC<br>TTTGGGT   | +3 C to T |
| LSP1-PBS14        | CTGTGAGAAGGCAACACT<br><b>GCCGG</b> | CAGCCCCAGCCGACAGTGTTCCTTCTCA                                                      | CCTCTCTGGGCC<br>TTTGGGT   | +3 C to T |
| LSP1-PBS13        | CTGTGAGAAGGCAACACT<br><b>GCCGG</b> | CAGCCCCAGCCGACAGTGTTCCTTCTC                                                       | CCTCTCTGGGCC<br>TTTGGGT   | +3 C to T |
| LSP1-PBS12        | CTGTGAGAAGGCAACACT<br><b>GCCGG</b> | CAGCCCCAGCCGACAGTGTTCCTTCT                                                        | CCTCTCTGGGCC<br>TTTGGGT   | +3 C to T |
| LSP1-G4-RT17      | CTGTGAGAAGGCAACACT<br><b>GCCGG</b> | CCCAGCCCCAGCCGACAGTGTTCCTTCTCA<br>GGGTGGGCCTGGGAGGG                               | CCTCTCTGGGCC<br>TTTGGGT   | +3 C to T |
| LSP1-G4-RT16      | CTGTGAGAAGGCAACACT<br><b>GCCGG</b> | CCAGCCCCAGCCGACAGTGTTCCTTCTCAG<br>GGTGGGCCTGGGAGGG                                | CCTCTCTGGGCC<br>TTTGGGT   | +3 C to T |
| LSP1-G4-RT15      | CTGTGAGAAGGCAACACT<br><b>GCCGG</b> | CAGCCCCAGCCGACAGTGTTCCTTCTCAGG<br>GTGGGCCTGGGAGGG                                 | CCTCTCTGGGCC<br>TTTGGGT   | +3 C to T |
| LSP1-G4-RT14      | CTGTGAGAAGGCAACACT<br><b>GCCGG</b> | AGCCCCAGCCGACAGTGTTCCTTCTCAGG<br>GTGGGCCTGGGAGGG                                  | CCTCTCTGGGCC<br>TTTGGGT   | +3 C to T |
| LSP1-G4-RT13      | CTGTGAGAAGGCAACACT<br><b>GCCGG</b> | GCCCCAGCCGACAGTGTTCCTTCTCAGGGT<br>GGGCCTGGGAGGG                                   | CCTCTCTGGGCC<br>TTTGGGT   | +3 C to T |
| LSP1-G4-RT12      | CTGTGAGAAGGCAACACT<br><b>GCCGG</b> | CCCCAGCCGACAGTGTTCCTTCTCAGGGTG<br>GGCCTGGGAGGG                                    | CCTCTCTGGGCC<br>TTTGGGT   | +3 C to T |
| LSP1-G4-PBS16     | CTGTGAGAAGGCAACACT<br><b>GCCGG</b> | CAGCCCCAGCCGACAGTGTTCCTTCTCACA<br>GGGTGGGCCTGGGAGGG                               | CCTCTCTGGGCC<br>TTTGGGT   | +3 C to T |
| LSP1-G4-PBS15     | CTGTGAGAAGGCAACACT<br><b>GCCGG</b> | CAGCCCCAGCCGACAGTGTTCCTTCTCAGG<br>GGTGGGCCTGGGAGGG                                | CCTCTCTGGGCC<br>TTTGGGT   | +3 C to T |
| LSP1-G4-PBS14     | CTGTGAGAAGGCAACACT<br><b>GCCGG</b> | CAGCCCCAGCCGACAGTGTTCCTTCTCAGG<br>GTGGGCCTGGGAGGG                                 | CCTCTCTGGGCC<br>TTTGGGT   | +3 C to T |
| LSP1-G4-PBS13     | CTGTGAGAAGGCAACACT<br><b>GCCGG</b> | CAGCCCCAGCCGACAGTGTTCCTTCTCGG<br>GTGGGCCTGGGAGGG                                  | CCTCTCTGGGCC<br>TTTGGGT   | +3 C to T |
| LSP1-G4-PBS12     | CTGTGAGAAGGCAACACT<br><b>GCCGG</b> | CAGCCCCAGCCGACAGTGTTCCTTCTGGGT<br>GGGCCTGGGAGGG                                   | CCTCTCTGGGCC<br>TTTGGGT   | +3 C to T |
| SEC61B-RT17       | ACTGATTGCTTTCAAAGTT<br><b>CTGG</b> | CTGTGTTTCATACCAGAACTTTGAAAGCAAT                                                   | GCCCTGCTACATG<br>ACGGAGT  | +7 C to T |
| SEC61B-RT16       | ACTGATTGCTTTCAAAGTT<br><b>CTGG</b> | TGTGTTTCATACCAGAACTTTGAAAGCAAT                                                    | GCCCTGCTACATG<br>ACGGAGT  | +7 C to T |
| SEC61B-RT15       | ACTGATTGCTTTCAAAGTT<br><b>CTGG</b> | GTGTTTCATACCAGAACTTTGAAAGCAAT                                                     | GCCCTGCTACATG<br>ACGGAGT  | +7 C to T |

|                 |                                    |                                                               |                          |           |
|-----------------|------------------------------------|---------------------------------------------------------------|--------------------------|-----------|
| SEC61B-RT14     | ACTGATTGCTTTCAAAGTT<br><b>CTGG</b> | TGTT <b>CATACCAGAA</b> CTTTGAAAGCAAT                          | GCCCTGCTACATG<br>ACGGAGT | +7 C to T |
| SEC61B-RT13     | ACTGATTGCTTTCAAAGTT<br><b>CTGG</b> | GTT <b>CATACCAGAA</b> CTTTGAAAGCAAT                           | GCCCTGCTACATG<br>ACGGAGT | +7 C to T |
| SEC61B-RT12     | ACTGATTGCTTTCAAAGTT<br><b>CTGG</b> | T <b>CATACCAGAA</b> CTTTGAAAGCAAT                             | GCCCTGCTACATG<br>ACGGAGT | +7 C to T |
| SEC61B-PBS16    | ACTGATTGCTTTCAAAGTT<br><b>CTGG</b> | TGTT <b>CATACCAGAA</b> CTTTGAAAGCAAT <b>CAG</b>               | GCCCTGCTACATG<br>ACGGAGT | +7 C to T |
| SEC61B-PBS15    | ACTGATTGCTTTCAAAGTT<br><b>CTGG</b> | TGTT <b>CATACCAGAA</b> CTTTGAAAGCAAT <b>CA</b>                | GCCCTGCTACATG<br>ACGGAGT | +7 C to T |
| SEC61B-PBS14    | ACTGATTGCTTTCAAAGTT<br><b>CTGG</b> | TGTT <b>CATACCAGAA</b> CTTTGAAAGCAAT <b>C</b>                 | GCCCTGCTACATG<br>ACGGAGT | +7 C to T |
| SEC61B-PBS13    | ACTGATTGCTTTCAAAGTT<br><b>CTGG</b> | TGTT <b>CATACCAGAA</b> CTTTGAAAGCAAT                          | GCCCTGCTACATG<br>ACGGAGT | +7 C to T |
| SEC61B-PBS12    | ACTGATTGCTTTCAAAGTT<br><b>CTGG</b> | TGTT <b>CATACCAGAA</b> CTTTGAAAGCAA                           | GCCCTGCTACATG<br>ACGGAGT | +7 C to T |
| SEC61B-G4-RT17  | ACTGATTGCTTTCAAAGTT<br><b>CTGG</b> | CTGTGTT <b>CATACCAGAA</b> CTTTGAAAGCAATG<br>GGTGGGCCTGGGAGGG  | GCCCTGCTACATG<br>ACGGAGT | +7 C to T |
| SEC61B-G4-RT16  | ACTGATTGCTTTCAAAGTT<br><b>CTGG</b> | TGTGTT <b>CATACCAGAA</b> CTTTGAAAGCAATGG<br>GTGGGCCTGGGAGGG   | GCCCTGCTACATG<br>ACGGAGT | +7 C to T |
| SEC61B-G4-RT15  | ACTGATTGCTTTCAAAGTT<br><b>CTGG</b> | GTGTT <b>CATACCAGAA</b> CTTTGAAAGCAATGGG<br>TGGGCCTGGGAGGG    | GCCCTGCTACATG<br>ACGGAGT | +7 C to T |
| SEC61B-G4-RT14  | ACTGATTGCTTTCAAAGTT<br><b>CTGG</b> | TGTT <b>CATACCAGAA</b> CTTTGAAAGCAATGGGT<br>GGGCCTGGGAGGG     | GCCCTGCTACATG<br>ACGGAGT | +7 C to T |
| SEC61B-G4-RT13  | ACTGATTGCTTTCAAAGTT<br><b>CTGG</b> | GTT <b>CATACCAGAA</b> CTTTGAAAGCAATGGGTG<br>GGCCTGGGAGGG      | GCCCTGCTACATG<br>ACGGAGT | +7 C to T |
| SEC61B-G4-RT12  | ACTGATTGCTTTCAAAGTT<br><b>CTGG</b> | T <b>CATACCAGAA</b> CTTTGAAAGCAATGGGTGG<br>GCCTGGGAGGG        | GCCCTGCTACATG<br>ACGGAGT | +7 C to T |
| SEC61B-G4-PBS16 | ACTGATTGCTTTCAAAGTT<br><b>CTGG</b> | TGTT <b>CATACCAGAA</b> CTTTGAAAGCAATCAGG<br>GGTGGGCCTGGGAGGG  | GCCCTGCTACATG<br>ACGGAGT | +7 C to T |
| SEC61B-G4-PBS15 | ACTGATTGCTTTCAAAGTT<br><b>CTGG</b> | TGTT <b>CATACCAGAA</b> CTTTGAAAGCAATCAGG<br>GTGGGCCTGGGAGGG   | GCCCTGCTACATG<br>ACGGAGT | +7 C to T |
| SEC61B-G4-PBS14 | ACTGATTGCTTTCAAAGTT<br><b>CTGG</b> | TGTT <b>CATACCAGAA</b> CTTTGAAAGCAATCGGG<br>TGGGCCTGGGAGGG    | GCCCTGCTACATG<br>ACGGAGT | +7 C to T |
| SEC61B-G4-PBS13 | ACTGATTGCTTTCAAAGTT<br><b>CTGG</b> | TGTT <b>CATACCAGAA</b> CTTTGAAAGCAATGGGT<br>GGGCCTGGGAGGG     | GCCCTGCTACATG<br>ACGGAGT | +7 C to T |
| SEC61B-G4-PBS12 | ACTGATTGCTTTCAAAGTT<br><b>CTGG</b> | TGTT <b>CATACCAGAA</b> CTTTGAAAGCAAGGGTG<br>GGCCTGGGAGGG      | GCCCTGCTACATG<br>ACGGAGT | +7 C to T |
| RUNX1-RT17      | GCATTTTCAGGAGGAAGC<br>GATGG        | GCTGTCTGAA <b>ACCATCG</b> CTTCTCCTGAAAA<br>T                  | ATGAAGCACTGTG<br>GGTACGA | +7 C to T |
| RUNX1-RT16      | GCATTTTCAGGAGGAAGC<br>GATGG        | CTGTCTGAA <b>ACCATCG</b> CTTCTCCTGAAAAAT                      | ATGAAGCACTGTG<br>GGTACGA | +7 C to T |
| RUNX1-RT15      | GCATTTTCAGGAGGAAGC<br>GATGG        | TGTCTGAA <b>ACCATCG</b> CTTCTCCTGAAAAAT                       | ATGAAGCACTGTG<br>GGTACGA | +7 C to T |
| RUNX1-RT14      | GCATTTTCAGGAGGAAGC<br>GATGG        | GTCTGAA <b>ACCATCG</b> CTTCTCCTGAAAAAT                        | ATGAAGCACTGTG<br>GGTACGA | +7 C to T |
| RUNX1-RT13      | GCATTTTCAGGAGGAAGC<br>GATGG        | TCTGAA <b>ACCATCG</b> CTTCTCCTGAAAAAT                         | ATGAAGCACTGTG<br>GGTACGA | +7 C to T |
| RUNX1-RT12      | GCATTTTCAGGAGGAAGC<br>GATGG        | CTGAA <b>ACCATCG</b> CTTCTCCTGAAAAAT                          | ATGAAGCACTGTG<br>GGTACGA | +7 C to T |
| RUNX1-PBS16     | GCATTTTCAGGAGGAAGC<br>GATGG        | TGTCTGAA <b>ACCATCG</b> CTTCTCCTGAAAAATG                      | ATGAAGCACTGTG<br>GGTACGA | +7 C to T |
| RUNX1-PBS15     | GCATTTTCAGGAGGAAGC<br>GATGG        | TGTCTGAA <b>ACCATCG</b> CTTCTCCTGAAAAAT                       | ATGAAGCACTGTG<br>GGTACGA | +7 C to T |
| RUNX1-PBS14     | GCATTTTCAGGAGGAAGC<br>GATGG        | TGTCTGAA <b>ACCATCG</b> CTTCTCCTGAAAA                         | ATGAAGCACTGTG<br>GGTACGA | +7 C to T |
| RUNX1-PBS13     | GCATTTTCAGGAGGAAGC<br>GATGG        | TGTCTGAA <b>ACCATCG</b> CTTCTCCTGAAA                          | ATGAAGCACTGTG<br>GGTACGA | +7 C to T |
| RUNX1-PBS12     | GCATTTTCAGGAGGAAGC<br>GATGG        | TGTCTGAA <b>ACCATCG</b> CTTCTCCTGAA                           | ATGAAGCACTGTG<br>GGTACGA | +7 C to T |
| RUNX1-G4-RT17   | GCATTTTCAGGAGGAAGC<br>GATGG        | GCTGTCTGAA <b>ACCATCG</b> CTTCTCCTGAAAA<br>TGGGTGGGCCTGGGAGGG | ATGAAGCACTGTG<br>GGTACGA | +7 C to T |
| RUNX1-G4-RT16   | GCATTTTCAGGAGGAAGC<br>GATGG        | CTGTCTGAA <b>ACCATCG</b> CTTCTCCTGAAAAAT<br>GGGTGGGCCTGGGAGGG | ATGAAGCACTGTG<br>GGTACGA | +7 C to T |
| RUNX1-G4-RT15   | GCATTTTCAGGAGGAAGC<br>GATGG        | TGTCTGAA <b>ACCATCG</b> CTTCTCCTGAAAAATG<br>GGTGGGCCTGGGAGGG  | ATGAAGCACTGTG<br>GGTACGA | +7 C to T |



|                 |                                     |                                                                       |                          |           |
|-----------------|-------------------------------------|-----------------------------------------------------------------------|--------------------------|-----------|
| RUNX1-G4-RT14   | GCATTTTCAGGAGGAAGC<br>GAT <b>GG</b> | <b>GTCTGAAACCATCG</b> CTT <b>CCCTCCTGAAAATGG</b><br>GTGGGCCTGGGAGGG   | ATGAAGCACTGTG<br>GGTACGA | +7 C to T |
| RUNX1-G4-RT13   | GCATTTTCAGGAGGAAGC<br>GAT <b>GG</b> | <b>TCTGAAACCATCG</b> CTT <b>CCCTCCTGAAAATGGG</b><br>TGGGCCTGGGAGGG    | ATGAAGCACTGTG<br>GGTACGA | +7 C to T |
| RUNX1-G4-RT12   | GCATTTTCAGGAGGAAGC<br>GAT <b>GG</b> | <b>CTGAAACCATCG</b> CTT <b>CCCTCCTGAAAATGGGT</b><br>GGGCCTGGGAGGG     | ATGAAGCACTGTG<br>GGTACGA | +7 C to T |
| RUNX1-PBS16     | GCATTTTCAGGAGGAAGC<br>GAT <b>GG</b> | <b>TGTCTGAAACCATCG</b> CTT <b>CCCTCCTGAAAATG</b><br>GGGTGGGCCTGGGAGGG | ATGAAGCACTGTG<br>GGTACGA | +7 C to T |
| RUNX1-G4-PBS15  | GCATTTTCAGGAGGAAGC<br>GAT <b>GG</b> | <b>TGTCTGAAACCATCG</b> CTT <b>CCCTCCTGAAAATG</b><br>GGTGGGCCTGGGAGGG  | ATGAAGCACTGTG<br>GGTACGA | +7 C to T |
| RUNX1-G4-PBS14  | GCATTTTCAGGAGGAAGC<br>GAT <b>GG</b> | <b>TGTCTGAAACCATCG</b> CTT <b>CCCTCCTGAAAAGG</b><br>GTGGGCCTGGGAGGG   | ATGAAGCACTGTG<br>GGTACGA | +7 C to T |
| RUNX1-G4-PBS13  | GCATTTTCAGGAGGAAGC<br>GAT <b>GG</b> | <b>TGTCTGAAACCATCG</b> CTT <b>CCCTCCTGAAAAGG</b><br>TGGGCCTGGGAGGG    | ATGAAGCACTGTG<br>GGTACGA | +7 C to T |
| RUNX1-G4-PBS12  | GCATTTTCAGGAGGAAGC<br>GAT <b>GG</b> | <b>TGTCTGAAACCATCG</b> CTT <b>CCCTCCTGAAAGGGT</b><br>GGGCCTGGGAGGG    | ATGAAGCACTGTG<br>GGTACGA | +7 C to T |
| SHANK3-RT17     | GTATCTCGAGTCGGTGG<br>CGT <b>GG</b>  | <b>GGCCACACCCTCCACG</b> ACCACCGACTCGAG                                | AGAACGACCTCAC<br>CTCGATG | +1 A to T |
| SHANK3-RT16     | GTATCTCGAGTCGGTGG<br>CGT <b>GG</b>  | <b>GCCACACCCTCCACG</b> ACCACCGACTCGAG                                 | AGAACGACCTCAC<br>CTCGATG | +1 A to T |
| SHANK3-RT15     | GTATCTCGAGTCGGTGG<br>CGT <b>GG</b>  | <b>CCACACCCTCCACG</b> ACCACCGACTCGAG                                  | AGAACGACCTCAC<br>CTCGATG | +1 A to T |
| SHANK3-RT14     | GTATCTCGAGTCGGTGG<br>CGT <b>GG</b>  | <b>CACACCCTCCACG</b> ACCACCGACTCGAG                                   | AGAACGACCTCAC<br>CTCGATG | +1 A to T |
| SHANK3-RT13     | GTATCTCGAGTCGGTGG<br>CGT <b>GG</b>  | <b>ACACCCTCCACG</b> ACCACCGACTCGAG                                    | AGAACGACCTCAC<br>CTCGATG | +1 A to T |
| SHANK3-RT12     | GTATCTCGAGTCGGTGG<br>CGT <b>GG</b>  | <b>CACCCTCCACG</b> ACCACCGACTCGAG                                     | AGAACGACCTCAC<br>CTCGATG | +1 A to T |
| SHANK3-PBS16    | GTATCTCGAGTCGGTGG<br>CGT <b>GG</b>  | <b>ACACCCTCCACG</b> ACCACCGACTCGAGATA                                 | AGAACGACCTCAC<br>CTCGATG | +1 A to T |
| SHANK3-PBS15    | GTATCTCGAGTCGGTGG<br>CGT <b>GG</b>  | <b>ACACCCTCCACG</b> ACCACCGACTCGAGAT                                  | AGAACGACCTCAC<br>CTCGATG | +1 A to T |
| SHANK3-PBS14    | GTATCTCGAGTCGGTGG<br>CGT <b>GG</b>  | <b>ACACCCTCCACG</b> ACCACCGACTCGAGA                                   | AGAACGACCTCAC<br>CTCGATG | +1 A to T |
| SHANK3-PBS13    | GTATCTCGAGTCGGTGG<br>CGT <b>GG</b>  | <b>ACACCCTCCACG</b> ACCACCGACTCGAG                                    | AGAACGACCTCAC<br>CTCGATG | +1 A to T |
| SHANK3-PBS12    | GTATCTCGAGTCGGTGG<br>CGT <b>GG</b>  | <b>ACACCCTCCACG</b> ACCACCGACTCGA                                     | AGAACGACCTCAC<br>CTCGATG | +1 A to T |
| SHANK3-G4-RT17  | GTATCTCGAGTCGGTGG<br>CGT <b>GG</b>  | <b>GGCCACACCCTCCACG</b> ACCACCGACTCGAG<br>GGGTGGGCCTGGGAGGG           | AGAACGACCTCAC<br>CTCGATG | +1 A to T |
| SHANK3-G4-RT16  | GTATCTCGAGTCGGTGG<br>CGT <b>GG</b>  | <b>GCCACACCCTCCACG</b> ACCACCGACTCGAGG<br>GGTGGGCCTGGGAGGG            | AGAACGACCTCAC<br>CTCGATG | +1 A to T |
| SHANK3-G4-RT15  | GTATCTCGAGTCGGTGG<br>CGT <b>GG</b>  | <b>CCACACCCTCCACG</b> ACCACCGACTCGAGGG<br>GTGGGCCTGGGAGGG             | AGAACGACCTCAC<br>CTCGATG | +1 A to T |
| SHANK3-G4-RT14  | GTATCTCGAGTCGGTGG<br>CGT <b>GG</b>  | <b>CACACCCTCCACG</b> ACCACCGACTCGAGGGG<br>TGGGCCTGGGAGGG              | AGAACGACCTCAC<br>CTCGATG | +1 A to T |
| SHANK3-G4-RT13  | GTATCTCGAGTCGGTGG<br>CGT <b>GG</b>  | <b>ACACCCTCCACG</b> ACCACCGACTCGAGGGGT<br>GGGCCTGGGAGGG               | AGAACGACCTCAC<br>CTCGATG | +1 A to T |
| SHANK3-G4-RT12  | GTATCTCGAGTCGGTGG<br>CGT <b>GG</b>  | <b>CACCCTCCACG</b> ACCACCGACTCGAGGGGTG<br>GGCCTGGGAGGG                | AGAACGACCTCAC<br>CTCGATG | +1 A to T |
| SHANK3-PBS16    | GTATCTCGAGTCGGTGG<br>CGT <b>GG</b>  | <b>ACACCCTCCACG</b> ACCACCGACTCGAGATAGG<br>GTGGGCCTGGGAGGG            | AGAACGACCTCAC<br>CTCGATG | +1 A to T |
| SHANK3-G4-PBS15 | GTATCTCGAGTCGGTGG<br>CGT <b>GG</b>  | <b>ACACCCTCCACG</b> ACCACCGACTCGAGATGG<br>GTGGGCCTGGGAGGG             | AGAACGACCTCAC<br>CTCGATG | +1 A to T |
| SHANK3-G4-PBS14 | GTATCTCGAGTCGGTGG<br>CGT <b>GG</b>  | <b>ACACCCTCCACG</b> ACCACCGACTCGAGAGGG<br>TGGGCCTGGGAGGG              | AGAACGACCTCAC<br>CTCGATG | +1 A to T |
| SHANK3-G4-PBS13 | GTATCTCGAGTCGGTGG<br>CGT <b>GG</b>  | <b>ACACCCTCCACG</b> ACCACCGACTCGAGGGGT<br>GGGCCTGGGAGGG               | AGAACGACCTCAC<br>CTCGATG | +1 A to T |
| SHANK3-G4-PBS12 | GTATCTCGAGTCGGTGG<br>CGT <b>GG</b>  | <b>ACACCCTCCACG</b> ACCACCGACTCGAGGGGTG<br>GGCCTGGGAGGG               | AGAACGACCTCAC<br>CTCGATG | +1 A to T |

The PAM in each target sequence is shown in bold. The PBS sequence are shown in blue.

The RT template are shown in red. The modifications are shown in green.

**Supplementary Table S3. Primers used for cell genomic DNA amplification and targeted deep sequencing.**

| <b>NO.</b>         | <b>Forward Primer</b>        | <b>Reverse Primer</b> |
|--------------------|------------------------------|-----------------------|
| JD-FANCF-F         | TGCCCAGAGTCAAGGAACAC         | CGACCAAAGCGCCGATGGAT  |
| JD-RUNX1-T1-F      | AATAGGGCTTGGGGAGTCCC         | CAAAGTTCTCACGCACCGAC  |
| JD-RNF2-F          | CCTGATCACCTCCCAAAGTC         | CTGTAAAGTCCATGGTTGGT  |
| JD-SEC61B-T1-F     | CATACCCACAGATGGAATG          | CCTATCTCATTGCTGCCTGC  |
| JD-LSP1-F          | CACTGAACCCTGGGTAGTGA         | GACACAGACAGCCAGAAGCT  |
| JD-SHANK3-T2-F     | ATGTCTAGGATCCTTGGGCC         | AACCTTCATGACGAGGCGGT  |
| JD-SHANK3-T1-F     | AAGGAGGTGCGCTTCGTGGT         | ACTAAGCAATGTACAGGGCG  |
| JD-UBE3A-T1-F      | GATGAAGTGACCATGGCAGA         | GCAATGACAGGGATAGCTAA  |
| seq-LSP1-hTR-F     | CTCAAGAGGTCCCCAAATGC         | CCATCACACAGGGAGGAGGT  |
| seq-LSP1-TERRA-F   | AGTCAACTCAAGAGGTCCCCAAATGC   | CCATCACACAGGGAGGAGGT  |
| seq-LSP1-MT3-F     | AGTTCCACTCAAGAGGTCCCCAAATGC  | CCATCACACAGGGAGGAGGT  |
| seq-LSP1-NRAS-F    | ATGTCACGCTCAAGAGGTCCCCAAATGC | CCATCACACAGGGAGGAGGT  |
| seq-LSP1-HS-F      | CACCGGTCTCAAGAGGTCCCCAAATGC  | CCATCACACAGGGAGGAGGT  |
| seq-LSP1-NS-F      | CACGATGCTCAAGAGGTCCCCAAATGC  | CCATCACACAGGGAGGAGGT  |
| seq-LSP1-F         | GAGTGGCTCAAGAGGTCCCCAAATGC   | CCATCACACAGGGAGGAGGT  |
| seq-SEC61B-hTR-F   | AGTTCCCAGGCTACCACGTA         | AACCACGGTCTTTACTCCAC  |
| seq-SEC61B-TERRA-F | AGTCAAAGTCCCAGGCTACCACGTA    | AACCACGGTCTTTACTCCAC  |
| seq-SEC61B-MT3-F   | AGTTCCAAGTCCCAGGCTACCACGTA   | AACCACGGTCTTTACTCCAC  |
| seq-SEC61B-NRAS-F  | ATGTCACGAGTCCCAGGCTACCACGTA  | AACCACGGTCTTTACTCCAC  |
| seq-SEC61B-HS-F    | CACCGGTAGTCCCAGGCTACCACGTA   | AACCACGGTCTTTACTCCAC  |
| seq-SEC61B-NS-F    | CACGATGAGTCCCAGGCTACCACGTA   | AACCACGGTCTTTACTCCAC  |
| seq-SEC61B-F       | GAGTGGAGTCCCAGGCTACCACGTA    | AACCACGGTCTTTACTCCAC  |
| seq-RNF2-hTR-F     | ATTTCCAGCAATGTCTCAGG         | ACAGAAGTCAGGAATGCTTG  |
| seq-RNF2-TERRA-F   | AGTCAAATTTCCAGCAATGTCTCAGG   | ACAGAAGTCAGGAATGCTTG  |
| seq-RNF2-MT3-F     | AGTTCCAATTTCCAGCAATGTCTCAGG  | ACAGAAGTCAGGAATGCTTG  |
| seq-RNF2-NRAS-F    | ATGTCACGATTTCCAGCAATGTCTCAGG | ACAGAAGTCAGGAATGCTTG  |
| seq-RNF2-HS-F      | CACCGGATTTCCAGCAATGTCTCAGG   | ACAGAAGTCAGGAATGCTTG  |
| seq-RNF2-NS-F      | CACGATGATTTCCAGCAATGTCTCAGG  | ACAGAAGTCAGGAATGCTTG  |
| seq-RNF2-F         | GAGTGGATTTCCAGCAATGTCTCAGG   | ACAGAAGTCAGGAATGCTTG  |
| seq-RUNX1-hTR-F    | GTGAGGCTGAAACAGTGACC         | TGCACCGAGGTGAAACAAGC  |

|                       |                              |                      |
|-----------------------|------------------------------|----------------------|
| seq-RUNX1-TERRA-F     | AGTCAAGTGAGGCTGAAACAGTGACC   | TGCACCGAGGTGAAACAAGC |
| seq-RUNX1-MT3-F       | AGTTCCAGTGAGGCTGAAACAGTGACC  | TGCACCGAGGTGAAACAAGC |
| seq-RUNX1-NRAS-F      | ATGTCACGGTGAGGCTGAAACAGTGACC | TGCACCGAGGTGAAACAAGC |
| seq-RUNX1-HS-F        | CACCGGTGTGAGGCTGAAACAGTGACC  | TGCACCGAGGTGAAACAAGC |
| seq-RUNX1-NS-F        | CACGATGGTGAGGCTGAAACAGTGACC  | TGCACCGAGGTGAAACAAGC |
| seq-RUNX1-F           | GAGTGGGTGAGGCTGAAACAGTGACC   | TGCACCGAGGTGAAACAAGC |
| seq-FANCF-hTR-F       | GGATGTTCCAATCAGTACGC         | ATGCCGACCAAAGCGCCGAT |
| seq-FANCF-TERRA-F     | AGTCAAGGATGTTCCAATCAGTACGC   | ATGCCGACCAAAGCGCCGAT |
| seq-FANCF-MT3-F       | AGTTCCAGGATGTTCCAATCAGTACGC  | ATGCCGACCAAAGCGCCGAT |
| seq-FANCF-NRAS-F      | ATGTCACGGGATGTTCCAATCAGTACGC | ATGCCGACCAAAGCGCCGAT |
| seq-FANCF-HS-F        | CACCGGTGGATGTTCCAATCAGTACGC  | ATGCCGACCAAAGCGCCGAT |
| seq-FANCF-NS-F        | CACGATGGGATGTTCCAATCAGTACGC  | ATGCCGACCAAAGCGCCGAT |
| seq-FANCF-F           | GAGTGGGGATGTTCCAATCAGTACGC   | ATGCCGACCAAAGCGCCGAT |
| seq-UBE3A-hTR-F       | TCATAGAGACAACTCTGGGT         | TTCTGGCCACTCTTATATTC |
| seq-UBE3A-TERRA-F     | AGTCAATCATAGAGACAACTCTGGGT   | TTCTGGCCACTCTTATATTC |
| seq-UBE3A-MT3-F       | AGTTCCATCATAGAGACAACTCTGGGT  | TTCTGGCCACTCTTATATTC |
| seq-UBE3A-NRAS-F      | ATGTCACGTCATAGAGACAACTCTGGGT | TTCTGGCCACTCTTATATTC |
| seq-UBE3A-HS-F        | CACCGTTCATAGAGACAACTCTGGGT   | TTCTGGCCACTCTTATATTC |
| seq-UBE3A-NS-F        | CACGATGTCATAGAGACAACTCTGGGT  | TTCTGGCCACTCTTATATTC |
| seq-UBE3A-F           | GAGTGGTCATAGAGACAACTCTGGGT   | TTCTGGCCACTCTTATATTC |
| seq-SHANKS-T1-hTR-F   | TTCCAGCAGAAGCCGCTGCA         | CAGCTGCCGTCCAGCTGCCT |
| seq-SHANKS-T1-TERRA-F | AGTCAATTCCAGCAGAAGCCGCTGCA   | CAGCTGCCGTCCAGCTGCCT |
| seq-SHANKS-T1-MT3-F   | AGTTCCATTCCAGCAGAAGCCGCTGCA  | CAGCTGCCGTCCAGCTGCCT |
| seq-SHANKS-T1-NRAS-F  | ATGTCACGTTCCAGCAGAAGCCGCTGCA | CAGCTGCCGTCCAGCTGCCT |
| seq-SHANKS-T1-HS-F    | CACCGTTTTCCAGCAGAAGCCGCTGCA  | CAGCTGCCGTCCAGCTGCCT |
| seq-SHANKS-T1-NS-F    | CACGATGTTCCAGCAGAAGCCGCTGCA  | CAGCTGCCGTCCAGCTGCCT |
| seq-SHANKS-T1-F       | GAGTGGTTCAGCAGAAGCCGCTGCA    | CAGCTGCCGTCCAGCTGCCT |
| seq-SHANK3-T2-hTR-F   | CTAGCTGGTGAAGCGCCTTC         | ACGTCCACCACAGGGCTCAG |
| seq-SHANK3-T2-TERRA-F | AGTCAACTAGCTGGTGAAGCGCCTTC   | ACGTCCACCACAGGGCTCAG |
| seq-SHANK3-T2-MT3-F   | AGTTCCACTAGCTGGTGAAGCGCCTTC  | ACGTCCACCACAGGGCTCAG |
| seq-SHANK3-T2-NRAS-F  | ATGTCACGCTAGCTGGTGAAGCGCCTTC | ACGTCCACCACAGGGCTCAG |
| seq-SHANK3-T2-HS-F    | CACCGTCTAGCTGGTGAAGCGCCTTC   | ACGTCCACCACAGGGCTCAG |
| seq-SHANK3-T2-NS-F    | CACGATGCTAGCTGGTGAAGCGCCTTC  | ACGTCCACCACAGGGCTCAG |

|                        |                              |                      |
|------------------------|------------------------------|----------------------|
| seq-SHANK3-T2-F        | GAGTGGCTAGCTGGTGAAGCGCCTTC   | ACGTCCACCACAGGGCTCAG |
| seq-LSP1-F             | CTCAAGAGGTCCCCAAATGC         | CCATCACACAGGGAGGAGGT |
| seq-LSP1-G4-F          | AGTCAACTCAAGAGGTCCCCAAATGC   | CCATCACACAGGGAGGAGGT |
| seq-LSP1-del-F         | AGTTCCACTCAAGAGGTCCCCAAATGC  | CCATCACACAGGGAGGAGGT |
| seq-LSP1-G4-del--F     | ATGTCACGCTCAAGAGGTCCCCAAATGC | CCATCACACAGGGAGGAGGT |
| seq-LSP1-ins-F         | CACCGGTCTCAAGAGGTCCCCAAATGC  | CCATCACACAGGGAGGAGGT |
| seq-LSP1-G4-ins-F      | CACGATGCTCAAGAGGTCCCCAAATGC  | CCATCACACAGGGAGGAGGT |
| seq-LSP1-untreated-F   | GAGTGGCTCAAGAGGTCCCCAAATGC   | CCATCACACAGGGAGGAGGT |
| seq-SEC61B-F           | AGTTCCCAGGCTACCACGTA         | AACCACGGTCTTTACTCCAC |
| seq-SEC61B-G4-F        | AGTCAAAGTTCCCAGGCTACCACGTA   | AACCACGGTCTTTACTCCAC |
| seq-SEC61B-del-F       | AGTTCCAAGTTCCCAGGCTACCACGTA  | AACCACGGTCTTTACTCCAC |
| seq-SEC61B-G4-del-F    | ATGTCACGAGTTCCCAGGCTACCACGTA | AACCACGGTCTTTACTCCAC |
| seq-SEC61B-ins-F       | CACCGGTAGTTCCCAGGCTACCACGTA  | AACCACGGTCTTTACTCCAC |
| seq-SEC61B-G4-ins-F    | CACGATGAGTTCCCAGGCTACCACGTA  | AACCACGGTCTTTACTCCAC |
| seq-SEC61B-untreated-F | GAGTGGAGTTCCCAGGCTACCACGTA   | AACCACGGTCTTTACTCCAC |
| seq-RNF2-F             | ATTTCCAGCAATGTCTCAGG         | ACAGAAGTCAGGAATGCTTG |
| seq-RNF2-G4-F          | AGTCAAATTTCCAGCAATGTCTCAGG   | ACAGAAGTCAGGAATGCTTG |
| seq-RNF2-del-F         | AGTTCCAATTTCCAGCAATGTCTCAGG  | ACAGAAGTCAGGAATGCTTG |
| seq-RNF2-G4-del-F      | ATGTCACGATTTCCAGCAATGTCTCAGG | ACAGAAGTCAGGAATGCTTG |
| seq-RNF2-ins-F         | CACCGGTATTTCCAGCAATGTCTCAGG  | ACAGAAGTCAGGAATGCTTG |
| seq-RNF2-G4-ins-F      | CACGATGATTTCCAGCAATGTCTCAGG  | ACAGAAGTCAGGAATGCTTG |
| seq-RNF2-untreated-F   | GAGTGGATTTCCAGCAATGTCTCAGG   | ACAGAAGTCAGGAATGCTTG |
| seq-RUNX1-F            | GTGAGGCTGAAACAGTGACC         | TGCACCGAGGTGAAACAAGC |
| seq-RUNX1-G4-F         | AGTCAAAGTGAGGCTGAAACAGTGACC  | TGCACCGAGGTGAAACAAGC |
| seq-RUNX1-del-F        | AGTTCCAGTGAGGCTGAAACAGTGACC  | TGCACCGAGGTGAAACAAGC |
| seq-RUNX1-G4-del-F     | ATGTCACGGTGAGGCTGAAACAGTGACC | TGCACCGAGGTGAAACAAGC |
| seq-RUNX1-ins-F        | CACCGGTGTGAGGCTGAAACAGTGACC  | TGCACCGAGGTGAAACAAGC |
| seq-RUNX1-G4-ins-F     | CACGATGGTGAGGCTGAAACAGTGACC  | TGCACCGAGGTGAAACAAGC |
| seq-RUNX1-untreated-F  | GAGTGGGTGAGGCTGAAACAGTGACC   | TGCACCGAGGTGAAACAAGC |
| seq-FANCF-F            | GGATGTTCCAATCAGTACGC         | ATGCCGACCAAAGCGCCGAT |
| seq-FANCF-G4-F         | AGTCAAGGATGTTCCAATCAGTACGC   | ATGCCGACCAAAGCGCCGAT |
| seq-FANCF-del-F        | AGTTCCAGGATGTTCCAATCAGTACGC  | ATGCCGACCAAAGCGCCGAT |
| seq-FANCF-G4-del-F     | ATGTCACGGGATGTTCCAATCAGTACGC | ATGCCGACCAAAGCGCCGAT |

|                           |                              |                      |
|---------------------------|------------------------------|----------------------|
| seq-FANCF-ins-F           | CACCGGTGGATGTTCCAATCAGTACGC  | ATGCCGACCAAAGCGCCGAT |
| seq-FANCF-G4-ins-F        | CACGATGGGATGTTCCAATCAGTACGC  | ATGCCGACCAAAGCGCCGAT |
| seq-FANCF-untreated-F     | GAGTGGGGATGTTCCAATCAGTACGC   | ATGCCGACCAAAGCGCCGAT |
| seq-UBE3A-F               | TCATAGAGACAACTCTGGGT         | TTCTGGCCACTCTTATATTC |
| seq-UBE3A-F               | TCATAGAGACAACTCTGGGT         | TTCTGGCCACTCTTATATTC |
| seq-UBE3A-G4-F            | AGTCAATCATAGAGACAACTCTGGGT   | TTCTGGCCACTCTTATATTC |
| seq-UBE3A-del-F           | AGTTCCATCATAGAGACAACTCTGGGT  | TTCTGGCCACTCTTATATTC |
| seq-UBE3A-G4-del-F        | ATGTCACGTCATAGAGACAACTCTGGGT | TTCTGGCCACTCTTATATTC |
| seq-UBE3A-ins-F           | CACCGGTTTCATAGAGACAACTCTGGGT | TTCTGGCCACTCTTATATTC |
| seq-UBE3A-G4-ins-F        | CACGATGTCATAGAGACAACTCTGGGT  | TTCTGGCCACTCTTATATTC |
| seq-UBE3A-untreated-F     | GAGTGGTCATAGAGACAACTCTGGGT   | TTCTGGCCACTCTTATATTC |
| seq-SHANKS-T1-F           | TTCCAGCAGAAGCCGCTGCA         | CAGCTGCCGTCCAGCTGCCT |
| seq-SHANKS-T1-G4-F        | AGTCAATTCCAGCAGAAGCCGCTGCA   | CAGCTGCCGTCCAGCTGCCT |
| seq-SHANKS-T1-del-F       | AGTTCCATTCCAGCAGAAGCCGCTGCA  | CAGCTGCCGTCCAGCTGCCT |
| seq-SHANKS-T1-G4-del-F    | ATGTCACGTTCCAGCAGAAGCCGCTGCA | CAGCTGCCGTCCAGCTGCCT |
| seq-SHANKS-T1-ins-F       | CACCGGTTTCCAGCAGAAGCCGCTGCA  | CAGCTGCCGTCCAGCTGCCT |
| seq-SHANKS-T1-G4-ins-F    | CACGATGTTCCAGCAGAAGCCGCTGCA  | CAGCTGCCGTCCAGCTGCCT |
| seq-SHANKS-T1-untreated-F | GAGTGGTTCCAGCAGAAGCCGCTGCA   | CAGCTGCCGTCCAGCTGCCT |
| seq-SHANK3-T2-F           | CTAGCTGGTGAAGCGCCTTC         | ACGTCCACCACAGGGCTCAG |
| seq-SHANK3-T2-G4-F        | AGTCAACTAGCTGGTGAAGCGCCTTC   | ACGTCCACCACAGGGCTCAG |
| seq-SHANK3-T2-del-F       | AGTTCCACTAGCTGGTGAAGCGCCTTC  | ACGTCCACCACAGGGCTCAG |
| seq-SHANK3-T2-G4-del-F    | ATGTCACGCTAGCTGGTGAAGCGCCTTC | ACGTCCACCACAGGGCTCAG |
| seq-SHANK3-T2-ins-F       | CACCGGTCTAGCTGGTGAAGCGCCTTC  | ACGTCCACCACAGGGCTCAG |
| seq-SHANK3-T2-G4-ins-F    | CACGATGCTAGCTGGTGAAGCGCCTTC  | ACGTCCACCACAGGGCTCAG |
| seq-SHANK3-T2-untreated-F | GAGTGGCTAGCTGGTGAAGCGCCTTC   | ACGTCCACCACAGGGCTCAG |
| seq-LSP1-PBS16-F          | ATGTCACGCTCAAGAGGTCCCCAAATGC | CCATCACACAGGGAGGAGGT |
| seq-LSP1-PBS15-F          | CACCGGTCTCAAGAGGTCCCCAAATGC  | CCATCACACAGGGAGGAGGT |
| seq-LSP1-PBS14-F          | CACGATGCTCAAGAGGTCCCCAAATGC  | CCATCACACAGGGAGGAGGT |
| seq-LSP1-PBS13-F          | GAGTGGCTCAAGAGGTCCCCAAATGC   | CCATCACACAGGGAGGAGGT |
| seq-LSP1-PBS12-F          | GTAGAGCCTCAAGAGGTCCCCAAATGC  | CCATCACACAGGGAGGAGGT |
| seq-LSP1-RT17-F           | GTGGCCCTCAAGAGGTCCCCAAATGC   | CCATCACACAGGGAGGAGGT |
| seq-LSP1-RT16-F           | TCCCGACTCAAGAGGTCCCCAAATGC   | CCATCACACAGGGAGGAGGT |
| seq-LSP1-RT15-F           | GTCCGCACTCAAGAGGTCCCCAAATGC  | CCATCACACAGGGAGGAGGT |

|                    |                              |                      |
|--------------------|------------------------------|----------------------|
| seq-LSP1-RT14-F    | ACTGATGCTCAAGAGGTCCCCAAATGC  | CCATCACACAGGGAGGAGGT |
| seq-LSP1-RT13-F    | ATTCCTCTCAAGAGGTCCCCAAATGC   | CCATCACACAGGGAGGAGGT |
| seq-LSP1-RT12-F    | GTGGCCCTCAAGAGGTCCCCAAATGC   | CCATCACACAGGGAGGAGGT |
| seq-LSP1-PBS16-F   | ATGTCACGCTCAAGAGGTCCCCAAATGC | CCATCACACAGGGAGGAGGT |
| seq-LSP1-PBS15-F   | CACCGGTCTCAAGAGGTCCCCAAATGC  | CCATCACACAGGGAGGAGGT |
| seq-LSP1-PBS14-F   | CACGATGCTCAAGAGGTCCCCAAATGC  | CCATCACACAGGGAGGAGGT |
| seq-LSP1-PBS13-F   | CGGAATCCTCAAGAGGTCCCCAAATGC  | CCATCACACAGGGAGGAGGT |
| seq-LSP1-PBS12-F   | GAGTGGCTCAAGAGGTCCCCAAATGC   | CCATCACACAGGGAGGAGGT |
| seq-LSP1-RT17-F    | GTGGCCCTCAAGAGGTCCCCAAATGC   | CCATCACACAGGGAGGAGGT |
| seq-LSP1-RT16-F    | TCCCGACTCAAGAGGTCCCCAAATGC   | CCATCACACAGGGAGGAGGT |
| seq-LSP1-RT15-F    | CGGAATCCTCAAGAGGTCCCCAAATGC  | CCATCACACAGGGAGGAGGT |
| seq-LSP1-RT14-F    | GTCCGCACTCAAGAGGTCCCCAAATGC  | CCATCACACAGGGAGGAGGT |
| seq-LSP1-RT13-F    | ACTGATGCTCAAGAGGTCCCCAAATGC  | CCATCACACAGGGAGGAGGT |
| seq-LSP1-RT12-F    | ATTCCTCTCAAGAGGTCCCCAAATGC   | CCATCACACAGGGAGGAGGT |
| seq-SEC61B-PBS16-F | ATGTCACGAGTCCCAGGCTACCACGTA  | AACCACGGTCTTTACTCCAC |
| seq-SEC61B-PBS15-F | CACCGGTAGTCCCAGGCTACCACGTA   | AACCACGGTCTTTACTCCAC |
| seq-SEC61B-PBS14-F | CACGATGAGTCCCAGGCTACCACGTA   | AACCACGGTCTTTACTCCAC |
| seq-SEC61B-PBS13-F | CGGAATCAGTCCCAGGCTACCACGTA   | AACCACGGTCTTTACTCCAC |
| seq-SEC61B-PBS12-F | GAGTGGAGTCCCAGGCTACCACGTA    | AACCACGGTCTTTACTCCAC |
| seq-SEC61B-RT17-F  | GTGGCCAGTCCCAGGCTACCACGTA    | AACCACGGTCTTTACTCCAC |
| seq-SEC61B-RT16-F  | TCCCGAAGTCCCAGGCTACCACGTA    | AACCACGGTCTTTACTCCAC |
| seq-SEC61B-RT15-F  | GTCCGCAAGTCCCAGGCTACCACGTA   | AACCACGGTCTTTACTCCAC |
| seq-SEC61B-RT14-F  | CGGAATCAGTCCCAGGCTACCACGTA   | AACCACGGTCTTTACTCCAC |
| seq-SEC61B-RT13-F  | ACTGATGAGTCCCAGGCTACCACGTA   | AACCACGGTCTTTACTCCAC |
| seq-SEC61B-RT12-F  | ATTCCTAGTCCCAGGCTACCACGTA    | AACCACGGTCTTTACTCCAC |
| seq-RUNX1-PBS16-F  | ATGTCACGGTGAGGCTGAAACAGTGACC | TGCACCGAGGTGAAACAAGC |
| seq-RUNX1-PBS15-F  | CGGAATCGTGAGGCTGAAACAGTGACC  | TGCACCGAGGTGAAACAAGC |
| seq-RUNX1-PBS14-F  | CACCGGTGTGAGGCTGAAACAGTGACC  | TGCACCGAGGTGAAACAAGC |
| seq-RUNX1-PBS13-F  | CACGATGGTGAGGCTGAAACAGTGACC  | TGCACCGAGGTGAAACAAGC |
| seq-RUNX1-PBS12-F  | GAGTGGGTGAGGCTGAAACAGTGACC   | TGCACCGAGGTGAAACAAGC |
| seq-RUNX1-RT17-F   | GTGGCCGTGAGGCTGAAACAGTGACC   | TGCACCGAGGTGAAACAAGC |
| seq-RUNX1-RT16-F   | TCCCGAGTGAGGCTGAAACAGTGACC   | TGCACCGAGGTGAAACAAGC |
| seq-RUNX1-RT15-F   | CGGAATCGTGAGGCTGAAACAGTGACC  | TGCACCGAGGTGAAACAAGC |

|                      |                               |                      |
|----------------------|-------------------------------|----------------------|
| seq-RUNX1-RT14-F     | GTCCGCAGTGAGGCTGAAACAGTGACC   | TGCACCGAGGTGAAACAAGC |
| seq-RUNX1-RT13-F     | ACTGATGGTGAGGCTGAAACAGTGACC   | TGCACCGAGGTGAAACAAGC |
| seq-RUNX1-RT12-F     | ATTCCTGTGAGGCTGAAACAGTGACC    | TGCACCGAGGTGAAACAAGC |
| seq-SHANK3-PBS16-F   | ATGTCACGCTAGCTGGTGAAGCGCCTTC  | ACGTCCACCACAGGGCTCAG |
| seq-SHANK3-PBS15-F   | CACCGGTCTAGCTGGTGAAGCGCCTTC   | ACGTCCACCACAGGGCTCAG |
| seq-SHANK3-PBS14-F   | CACGATGCTAGCTGGTGAAGCGCCTTC   | ACGTCCACCACAGGGCTCAG |
| seq-SHANK3-PBS13-F   | CGGAATCCTAGCTGGTGAAGCGCCTTC   | ACGTCCACCACAGGGCTCAG |
| seq-SHANK3-PBS12-F   | GAGTGGCTAGCTGGTGAAGCGCCTTC    | ACGTCCACCACAGGGCTCAG |
| seq-SHANK3-RT17-F    | GTGGCCCTAGCTGGTGAAGCGCCTTC    | ACGTCCACCACAGGGCTCAG |
| seq-SHANK3-RT16-F    | TCCCGACTAGCTGGTGAAGCGCCTTC    | ACGTCCACCACAGGGCTCAG |
| seq-SHANK3-RT15-F    | GTCCGCACTAGCTGGTGAAGCGCCTTC   | ACGTCCACCACAGGGCTCAG |
| seq-SHANK3-RT14-F    | ACTGATGCTAGCTGGTGAAGCGCCTTC   | ACGTCCACCACAGGGCTCAG |
| seq-SHANK3-RT13-F    | CGGAATCCTAGCTGGTGAAGCGCCTTC   | ACGTCCACCACAGGGCTCAG |
| seq-SHANK3-RT12-F    | ATTCCTCTAGCTGGTGAAGCGCCTTC    | ACGTCCACCACAGGGCTCAG |
| seq-HEK3-WT-F        | ATCACGAGGGAAACGCCCATGCAAT     | CCTCCCTAGGTGCTGGCTT  |
| seq-HEK3-G4-F        | CGATGTTAGGGAAACGCCCATGCAAT    | CCTCCCTAGGTGCTGGCTT  |
| seq-HEK3-evopreQ1-F  | TTAGGCAGAGGGAAACGCCCATGCAAT   | CCTCCCTAGGTGCTGGCTT  |
| seq-RNF2-WT-F        | ATCACGAGCCAACATACAGAAGTCAG    | TTTCCAGCAATGTCTCAGGC |
| seq-RNF2-G4-F        | CGATGTTAGCCAACATACAGAAGTCAG   | TTTCCAGCAATGTCTCAGGC |
| seq-RNF2-evopreQ1-F  | TTAGGCAGAGCCAACATACAGAAGTCAG  | TTTCCAGCAATGTCTCAGGC |
| seq-VEGFA-WT-F       | ATCACGACTTGGTGCCAAATTCTTCTCC  | AAGAGGGAATGGGCTTTGGA |
| seq-VEGFA-G4-F       | CGATGTTACTTGGTGCCAAATTCTTCTCC | AAGAGGGAATGGGCTTTGGA |
| seq-VEGFA-evopreQ1-F | TTAGGCAGACTTGGTGCCAAATTCTTCTC | AAGAGGGAATGGGCTTTGGA |
| seq-DNMT1-WT-F       | ATCACGCACAACAGCTTCATGTCAGC    | GGTCCATGTCTGTTACTCGC |
| seq-DNMT1-G4-F       | CGATGTTCCACAACAGCTTCATGTCAGC  | GGTCCATGTCTGTTACTCGC |
| seq-DNMT1-evopreQ1-F | TTAGGCAGCACAACAGCTTCATGTCAGC  | GGTCCATGTCTGTTACTCGC |
| seq-RUNX1-WT-F       | ATCACGAAGAAAGAGAGATGTAGGGC    | CATTACAGGCAAAGCTGAGC |
| seq-RUNX1-G4-F       | CGATGTTAAGAAAGAGAGATGTAGGGC   | CATTACAGGCAAAGCTGAGC |
| seq-RUNX1-evopreQ1-F | TTAGGCAGAAGAAAGAGAGATGTAGGGC  | CATTACAGGCAAAGCTGAGC |
| seq-LSP-G4-F         | AGTTCCACTCAAGAGGTCCCCAAATGC   | CCATCACACAGGGAGGAGGT |
| seq-LSP-evopreQ1-F   | ATGTCACGCTCAAGAGGTCCCCAAATGC  | CCATCACACAGGGAGGAGGT |
| seq-LSP-Mpknot-F     | CACCGGTCTCAAGAGGTCCCCAAATGC   | CCATCACACAGGGAGGAGGT |
| seq-LSP-XR-F         | CACGATGCTCAAGAGGTCCCCAAATGC   | CCATCACACAGGGAGGAGGT |

|                      |                               |                      |
|----------------------|-------------------------------|----------------------|
| seq-FANCF-G4-F       | AGTTCCAGGATGTTCCAATCAGTACGC   | ATGCCGACCAAAGCGCCGAT |
| seq-FANCF-evopreQ1-F | ATGTCACGGGATGTTCCAATCAGTACGC  | ATGCCGACCAAAGCGCCGAT |
| seq-FANCF-Mpknot-F   | CACCGGTGGATGTTCCAATCAGTACGC   | ATGCCGACCAAAGCGCCGAT |
| seq-FANCF-XR-F       | CACGATGGGATGTTCCAATCAGTACGC   | ATGCCGACCAAAGCGCCGAT |
| seq-SEC-G4-F         | AGTTCCAAGTCCCAGGCTACCACGTA    | AACCACGGTCTTTACTCCAC |
| seq-SEC-evopreQ1-F   | ATGTCACGAGTCCCAGGCTACCACGTA   | AACCACGGTCTTTACTCCAC |
| seq-SEC-Mpknot-F     | CACCGGTAGTCCCAGGCTACCACGTA    | AACCACGGTCTTTACTCCAC |
| seq-SEC-XR-F         | CACGATGAGTCCCAGGCTACCACGTA    | AACCACGGTCTTTACTCCAC |
| seq-UBE3A-G4-F       | AGTCAATCATAGAGACA ACTCTGGGT   | TTCTGGCCACTCTTATATTC |
| seq-UBE3A-evopreQ1-F | AGTTCCATCATAGAGACA ACTCTGGGT  | TTCTGGCCACTCTTATATTC |
| seq-UBE3A-Mpknot-F   | ATGTCACGTCATAGAGACA ACTCTGGGT | TTCTGGCCACTCTTATATTC |
| seq-UBE3A-XR-F       | CACCGGTT CATAGAGACA ACTCTGGGT | TTCTGGCCACTCTTATATTC |



**Supplementary Table S4. Primers used for off-target analysis.**

| <b>NO.</b>          | <b>Forward Primer</b> | <b>Reverse Primer</b> |
|---------------------|-----------------------|-----------------------|
| seq-SEC61B-peg-OT1  | CATCAGTGCAGACTTCTAGC  | GTTTGGCCAAATCAAAGGAT  |
| seq-SEC61B-peg-OT2  | TGCAGCCCCTCTATACCAAT  | TAAAGTACACACATTTCAGAC |
| seq-SEC61B-peg-OT3  | CAGTCAGATTTTTGGCCTAG  | CACACTGGCTCTCAGTGAAG  |
| seq-SEC61B-peg-OT4  | GAGTAGCCTTCCAAAGGGAA  | ATGTTGCCCAAAGGAAAAGA  |
| seq-SEC61B-peg-OT5  | CGCCACTGATTCATCCTTTG  | CATGCAAGTGGGTATTATTT  |
| seq-SEC61B-nick-OT1 | CTGCTGTGACAGGGCTGCAG  | CTCAGGTGAGCAATCACAGT  |
| seq-SEC61B-nick-OT2 | CCAGGGGCATGTTGTAGGGC  | TCCTGCTCTGCCCTGTGGC   |
| seq-SEC61B-nick-OT3 | GATGAACACAATGGAGAGGA  | GTACCTTGAGTTTGAAAGA   |
| seq-SEC61B-nick-OT4 | GGACCTATGCTGTTCCCAAG  | GGCAAGATACAGGGCAGGAC  |
| seq-SEC61B-nick-OT5 | ATGCAGCTGAAGACCTGGTA  | TTGGGTTCTCGTCTGCTAC   |
| seq-SEC61B-nick-OT6 | ATGCCAGGCCCCATAATATT  | AAGTGGCCAGATGGTCGAA   |
| seq-RNF2-peg-OT1    | GCTGTGCCACCCACACACCA  | TGACCTAAAAGGCCCTCACA  |
| seq-RNF2-peg-OT2    | AGTCAGGAGCTTGCAGCACA  | CCATGTGTGGCTGTCAAGCA  |
| seq-RNF2-peg-OT3    | ACCAGGTATCTGTCTTGACA  | CCTATCTTTACAGCACAGGT  |
| seq-RNF2-peg-OT4    | TTGGGCAGGGACACACATCC  | GATGAGGAACCAAGGCATCC  |
| seq-RNF2-peg-OT5    | CCCAGAAAGCTTCCTTACCT  | GTTATATGCAGCCATTGTGG  |
| seq-RNF2-nick-OT1   | CAGCACAGTGATTTTGAGAG  | ATAAGGCACTGCAATCAATC  |
| seq-RNF2-nick-OT2   | AGACAGGCTCTGAGTACT    | AGCAAGAGGCAAGGACCATG  |
| seq-RNF2-nick-OT3   | CAGTGAAGTGAGTGGGTGGG  | GCCAGCTCACAAGTCTGGAG  |
| seq-RNF2-nick-OT4   | GTGATGACAGAGGTGCCGGT  | TCCCAAAGTGCTGGGATTAC  |
| seq-RUNX1-peg-OT1   | TCTGGCAAAGGGGATCGTGG  | TGGTTTCCTCAGCTTAGGGC  |
| seq-RUNX1-peg-OT2   | GCATGAGGGTACTGGCCTT   | TGTCGGGTGGTCTGATAGCT  |
| seq-RUNX1-peg-OT3   | CATGGGTAAATGCAATACCC  | GTGCCTGTCTGATCTGAATA  |
| seq-RUNX1-peg-OT4   | CCACTGTATTCCAGGTGCCT  | TTCCAGGGCTAGCGGGTGAT  |
| seq-RUNX1-peg-OT5   | CTTATGGTGAAGTCCAGGG   | CCCATTGTTCTGGCTGTTAG  |
| seq-RUNX1-nick-OT1  | GCAAGCAGCCCGCCACCATC  | GAAGAGACTAGCTACTCG    |
| seq-RUNX1-nick-OT2  | CAGACCTTACAACTGAAGCT  | GATCCCACGCATTTGAAACA  |
| seq-RUNX1-nick-OT3  | GAACCCTGAGGACATTTTGC  | TCATCGTGCAGGCACCACCA  |
| seq-RUNX1-nick-OT4  | GTCATCTTCCTGGTTGAGCT  | ACCAGCAGCTGGGATGCAGA  |
| seq-RUNX1-nick-OT5  | CCAGACCATCCATGGCTGTC  | GACCCTGCACAGAGCAACAA  |
